# Supplementary material for: A review of metal-organic frameworks and polymers in mixed matrix membranes for CO2 capture
Source: Beilstein J Nanotechnol. 2025 Feb 12;16:155–86. doi: 10.3762/bjnano.16.14 (PMC11833178; doi:10.3762/bjnano.16.14)
Supplement: File 1 — Literature and data used for Figure 10. [file Beilstein_J_Nanotechnol-16-155-s001.xlsx]

## Sheet: Robeson
	CO2/CH4										CO2/N2
	MOF	Polymer	Loading	T (°C)	P (bar)	Gas ratio CO2/CH4	Selectivity (-)	Permeability (Barrer)	DOI		MOF	Polymer	Loading	T (°C)	P (bar)	Gas ratio CO2/N2	Selectivity (-)	Permeability (Barrer)	DOI
	HKUST-1	PDMS	10 wt%	-	-	Single	3.6	2900	10.1016/j.desal.2006.03.390		HKUST-1	PDMS	10 wt%	NA	NA	Single	8.9	2900	10.1016/j.desal.2006.03.390
	HKUST-1	PSf	5 wt%	-	-	Single	21	7.5	10.1016/j.desal.2006.03.390		HKUST-1	PSf	5 wt%	NA	NA	Single	25	7.5	10.1016/j.desal.2006.03.390
	MOF-5	Matrimid 5218	10 wt%	35	2	Single	51	11.1	10.1016/j.memsci.2008.12.006		ZIF-8	Matrimid	20 wt%	25	2.7	Single	30.1	9.03	10.1016/j.memsci.2010.06.017
	MOF-5	Matrimid 5218	20 wt%	35	2	Single	40.5	13.8	10.1016/j.memsci.2008.12.006		ZIF-8	Matrimid	30 wt%	25	2.7	Single	24.1186	14.23	10.1016/j.memsci.2010.06.017
	MOF-5	Matrimid 5218	30 wt%	35	2	Single	44.7	20.2	10.1016/j.memsci.2008.12.006		ZIF-8	Matrimid	40 wt%	25	2.7	Single	23.381	24.55	10.1016/j.memsci.2010.06.017
	ZIF-90	Ultem	15 wt%	35	4.6	Single	39	2.9	10.1002/anie.201006141		ZIF-8	Matrimid	50 wt%	25	2.7	Single	26.2222	4.72	10.1016/j.memsci.2010.06.017
	ZIF-90	Matrimid	15 wt%	35	4.6	Single	35	10.5	10.1002/anie.201006141		ZIF-8	Matrimid	60 wt%	25	2.7	Single	18.3636	8.08	10.1016/j.memsci.2010.06.017
	ZIF-90	6DFA-DAM	15 wt%	25	2.03	Single	28	800	10.1002/anie.201006141		Cu 1,4-BDC	PVAc	15 wt%	35	4.5	Single	35.4	3.26	10.1016/j.micromeso.2009.11.035
	ZIF-90A	6DFA-DAM	15 wt%	25	2.03	50/50	37	720	10.1002/anie.201006141		ZIF-8	PPEEs	10 wt%	30	1	Single	31.88	7.97	10.1016/j.memsci.2011.08.042
	ZIF-90B	6DFA-DAM	15 wt%	25	2.03	50/50	34	590	10.1002/anie.201006141		ZIF-8	PPEEs	20 wt%	30	1	Single	28.2812	18.1	10.1016/j.memsci.2011.08.042
	Cu 1,4-BDC	PVAc	15 wt%	35	4.5	Single	40.4	3.26	10.1016/j.micromeso.2009.11.035		ZIF-8	PPEEs	30 wt%	30	1	Single	24.5245	50.03	10.1016/j.memsci.2011.08.042
	ZIF-8	Matrimid	50 wt%	25	2.7	Single	51.06	9.03	10.1016/j.memsci.2010.06.017		HKUST-1/S1C	Udel® PSF	16 wt%	35	2.75	Single	38	8.4	10.1002/cphc.201100583
	ZIF-8	Matrimid	60 wt%	25	2.7	Single	38.22	14.23	10.1016/j.memsci.2010.06.017		ZIF-8	Matrimid	20 wt%	22	4	Single	19	16.63	10.1039/c2ee21996d
	ZIF-8	Matrimid	50 wt%	25	2.7	Single	27.84	24.55	10.1016/j.memsci.2010.06.017		ZIF-8	6FDA-DAM:DABA (4:1)	20 wt%	30	1.4	Single	19.3	553	10.1016/j.memsci.2012.08.026
	ZIF-8	Matrimid	50 wt%	25	2.7	Single	124.89	4.72	10.1016/j.memsci.2010.06.017		Mg2(dobdc)	XLPEO	10 wt%	25	2	Single	25	250	10.1039/c3ee42394h
	ZIF-8	Matrimid	60 wt%	25	2.7	Single	80.77	8.08	10.1016/j.memsci.2010.06.017		Mg2(dobdc)	PI	10 wt%	25	2	Single	23	850	10.1039/c3ee42394h
	MIL-53-NH2	PSF	25 wt%	-	-	50/50	117	2.4	10.1039/c1cc13431k		ZIF-8	Poly[vbim][NTf2]/[emim][NTf2]	9.9 wt%	35	3.5	Single	21.1	367.1	10.1016/j.memsci.2013.02.034
	HKUST-1/S1C	Udel® PSF	16 wt%	35	2.75	Single	22.4	8.9	10.1002/cphc.201100583		ZIF-8	Poly[vbim][NTf2]/[emim][NTf2]	18.8 wt%	35	3.5	Single	20.4	623.2	10.1016/j.memsci.2013.02.034
	ZIF-8	PPEEs	10 wt%	30	1	Single	29.5185	7.97	10.1016/j.memsci.2011.08.042		ZIF-8	Poly[vbim][NTf2]/[emim][NTf2]	23.7 wt%	35	3.5	Single	19.6	693.6	10.1016/j.memsci.2013.02.034
	ZIF-8	PPEEs	20 wt%	30	1	Single	24.1333	18.1	10.1016/j.memsci.2011.08.042		ZIF-8	Poly[vbim][NTf2]/[emim][B(CN)4]	9.9 wt%	35	3.5	Single	28.2	734.9	10.1016/j.memsci.2013.02.034
	ZIF-8	PPEEs	30 wt%	30	1	Single	20.8458	50.03	10.1016/j.memsci.2011.08.042		ZIF-8	Poly[vbim][NTf2]/[emim][B(CN)4]	20.0 wt%	35	3.5	Single	25	907.4	10.1016/j.memsci.2013.02.034
	ZIF-8	Matrimid	20 wt%	22	4	Single	35.8	16.63	10.1039/c2ee21996d		ZIF-8	Poly[vbim][NTf2]/[emim][B(CN)4]	25.8 wt%	35	3.5	Single	24.2	1062.4	10.1016/j.memsci.2013.02.034
	UiO-66	6FDA-ODA	25 wt%	35	10.3	Single	46.1	50.4	10.1016/j.memsci.2012.04.003		ZIF-8	Poly[vbim][NTf2]/[emim][BF4]	10.1 wt%	35	3.5	Single	31.3	241.3	10.1016/j.memsci.2013.02.034
	UiO-66	6FDA-ODA	25 wt%	35	10.3	50/50	42.3	50.4	10.1016/j.memsci.2012.04.003		ZIF-8	Poly[vbim][NTf2]/[emim][BF4]	19.7 wt%	35	3.5	Single	28.8	294.1	10.1016/j.memsci.2013.02.034
	NH2-UiO-66	6FDA-ODA	25 wt%	35	10.3	Single	51.6	13.7	10.1016/j.memsci.2012.04.003		ZIF-8	Poly[vbim][NTf2]/[emim][BF4]	26.4 wt%	35	3.5	Single	29.1	340	10.1016/j.memsci.2013.02.034
	NH2-UiO-66	6FDA-ODA	25 wt%	35	10.3	50/50	44.7	13.7	10.1016/j.memsci.2012.04.003		ZIF-8	Poly[vbim][NTf2]/[emim][B(CN)4]	25.8 wt%	35	3.5	50/50	20.9	865.1	10.1016/j.memsci.2013.02.034
	UiO-67	6FDA-ODA	25 wt%	35	10.3	Single	15	20.8	10.1016/j.memsci.2012.04.003		Mg2(dobdc)	PDMS	20 wt%	25	2	Single	12	2100	10.1039/c3ee42394h
	UiO-67	6FDA-ODA	25 wt%	35	10.3	50/50	15	20.8	10.1016/j.memsci.2012.04.003		CC3	PIM-1	10 wt%	25	1	Single	21.6667	3250	10.1002/anie.201206339
	MOF-199	6FDA-ODA	25 wt%	35	10.3	Single	51.2	21.8	10.1016/j.memsci.2012.04.003		CC3	PIM-1	20 wt%	25	1	Single	22.1364	4870	10.1002/anie.201206339
	MOF-199	6FDA-ODA	25 wt%	35	10.3	50/50	50.7	21.8	10.1016/j.memsci.2012.04.003		CC3	PIM-1	30 wt%	25	1	Single	20.1111	5430	10.1002/anie.201206339
	NH2-MOF-199	6FDA-ODA	25 wt%	35	10.3	Single	59.6	26.6	10.1016/j.memsci.2012.04.003		redCC3	PIM-1	10 wt%	25	1	Single	24.6667	1480	10.1002/anie.201206339
	NH2-MOF-199	6FDA-ODA	25 wt%	35	10.3	50/50	52.4	26.6	10.1016/j.memsci.2012.04.003		redCC3	PIM-1	20 wt%	25	1	Single	26	780	10.1002/anie.201206339
	CC3	PIM-1	10 wt%	25	1	Single	14.1304	3250	10.1002/anie.201206339		nanoCC3	PIM-1	20 wt%	25	1	Single	18.0185	9730	10.1002/anie.201206339
	CC3	PIM-1	20 wt%	25	1	Single	12.8158	4870	10.1002/anie.201206339		nanoCC3	PIM-1	30 wt%	25	1	Single	16.8286	5890	10.1002/anie.201206339
	CC3	PIM-1	30 wt%	25	1	Single	11.3125	5430	10.1002/anie.201206339		CC3	PIM-1 (EtOH treated)	10 wt%	25	1	Single	13.9111	18780	10.1002/anie.201206339
	redCC3	PIM-1	10 wt%	25	1	Single	16.4444	1480	10.1002/anie.201206339		CC3	PIM-1 (EtOH treated)	20 wt%	25	1	Single	11.4831	27100	10.1002/anie.201206339
	redCC3	PIM-1	20 wt%	25	1	Single	15.6	780	10.1002/anie.201206339		CC3	PIM-1 (EtOH treated)	30 wt%	25	1	Single	11.4373	37400	10.1002/anie.201206339
	nanoCC3	PIM-1	20 wt%	25	1	Single	12.3165	9730	10.1002/anie.201206339		redCC3	PIM-1 (EtOH treated)	10 wt%	25	1	Single	19.6786	5510	10.1002/anie.201206339
	nanoCC3	PIM-1	30 wt%	25	1	Single	9.5	5890	10.1002/anie.201206339		redCC3	PIM-1 (EtOH treated)	20 wt%	25	1	Single	19.5789	3720	10.1002/anie.201206339
	CC3	PIM-1 (EtOH treated)	20 wt%	25	1	Single	5.57613	27100	10.1002/anie.201206339		nanoCC3	PIM-1 (EtOH treated)	20 wt%	25	1	Single	19.3766	14920	10.1002/anie.201206339
	CC3	PIM-1 (EtOH treated)	30 wt%	25	1	Single	5.18006	37400	10.1002/anie.201206339		nanoCC3	PIM-1 (EtOH treated)	30 wt%	25	1	Single	17.9109	18090	10.1002/anie.201206339
	redCC3	PIM-1 (EtOH treated)	10 wt%	25	1	Single	13.775	5510	10.1002/anie.201206339		ZIF-7	Pebax 1657	8 wt%	20	2.75	Single	68	145	10.1016/j.memsci.2012.09.006
	redCC3	PIM-1 (EtOH treated)	20 wt%	25	1	Single	13.1915	3720	10.1002/anie.201206339		ZIF-7	Pebax 1657	22 wt%	20	2.75	Single	97	111	10.1016/j.memsci.2012.09.006
	nanoCC3	PIM-1 (EtOH treated)	20 wt%	25	1	Single	14.995	14920	10.1002/anie.201206339		ZIF-7	Pebax 1657	34 wt%	20	2.75	Single	105	41	10.1016/j.memsci.2012.09.006
	nanoCC3	PIM-1 (EtOH treated)	30 wt%	25	1	Single	14.1328	18090	10.1002/anie.201206339		ZIF-8	6FDA-Durene	33.3 wt%	35	3.5	Single	11.3	1552.9	10.1021/ie400149e
	ZIF-8	Poly[vbim][NTf2]/[emim][NTf2]	9.9 wt%	35	3.5	Single	13	367.1	10.1016/j.memsci.2013.02.034		Sonicated HKUST-1	PPO	10 wt%	30	ND	Single	20.5	87	10.1039/c3ta11131h
	ZIF-8	Poly[vbim][NTf2]/[emim][NTf2]	18.8 wt%	35	3.5	Single	13	623.2	10.1016/j.memsci.2013.02.034		Sonicated HKUST-1	PPO	20 wt%	30	ND	Single	20	107	10.1039/c3ta11131h
	ZIF-8	Poly[vbim][NTf2]/[emim][NTf2]	23.7 wt%	35	3.5	Single	12.1	693.6	10.1016/j.memsci.2013.02.034		Sonicated HKUST-1	PPO	30 wt%	30	ND	Single	21	108	10.1039/c3ta11131h
	ZIF-8	Poly[vbim][NTf2]/[emim][B(CN)4]	9.9 wt%	35	3.5	Single	14.4	734.9	10.1016/j.memsci.2013.02.034		Sonicated HKUST-1	PPO	40 wt%	30	ND	Single	23	114	10.1039/c3ta11131h
	ZIF-8	Poly[vbim][NTf2]/[emim][B(CN)4]	20.0 wt%	35	3.5	Single	13.7	907.4	10.1016/j.memsci.2013.02.034		ZIF-8	PBI-BuI	10 wt%	35	20	Single	20.2	2.8	10.1039/c4ta00611a
	ZIF-8	Poly[vbim][NTf2]/[emim][B(CN)4]	25.8 wt%	35	3.5	Single	12.3	1062.4	10.1016/j.memsci.2013.02.034		ZIF-8	PBI-BuI	20 wt%	35	20	Single	21.1	3.83	10.1039/c4ta00611a
	ZIF-8	Poly[vbim][NTf2]/[emim][BF4]	10.1 wt%	35	3.5	Single	16.4	241.3	10.1016/j.memsci.2013.02.034		ZIF-8	PBI-BuI	30 wt%	35	20	Single	16	5.23	10.1039/c4ta00611a
	ZIF-8	Poly[vbim][NTf2]/[emim][BF4]	19.7 wt%	35	3.5	Single	16.5	294.1	10.1016/j.memsci.2013.02.034		ZIF-8	DMPBI-BuI	10 wt%	35	20	Single	18.7	6.7	10.1039/c4ta00611a
	ZIF-8	Poly[vbim][NTf2]/[emim][BF4]	26.4 wt%	35	3.5	Single	16.6	340	10.1016/j.memsci.2013.02.034		ZIF-8	DMPBI-BuI	20 wt%	35	20	Single	14	9	10.1039/c4ta00611a
	ZIF-8	Poly[vbim][NTf2]/[emim][B(CN)4]	25.8 wt%	35	3.5	50/50	11.6	854.7	10.1016/j.memsci.2013.02.034		ZIF-8	DMPBI-BuI	30 wt%	35	20	Single	11.3	53.9	10.1039/c4ta00611a
	ZIF-8	6FDA-Durene	33.3 wt%	35	3.5	Single	11	1552.9	10.1021/ie400149e		ZIF-8	DBzPBI-BuI	10 wt%	35	20	Single	13	60.2	10.1039/c4ta00611a
	MIL-53	Matrimid 5218	15 wt%	35	10.3	Single	9.4	6.7	10.1039/C3RA43486A		ZIF-8	DBzPBI-BuI	20 wt%	35	20	Single	14.3	89.8	10.1039/c4ta00611a
	MIL-53	Ultem 1000	15 wt%	35	10.3	Single	43.1	1.77	10.1039/C3RA43486A		ZIF-71	6FDA-Durene	10 wt%	35	3.5	Single	14.9	1805	10.1016/j.memsci.2014.05.025
	MIL-53-NH2	Matrimid 5218	15 wt%	35	10.3	Single	2.1	9.2	10.1039/C3RA43486A		ZIF-71	6FDA-Durene	20 wt%	35	3.5	Single	12.9	4006	10.1016/j.memsci.2014.05.025
	MIL-53-NH2	Ultem 1000	15 wt%	35	10.3	Single	36.2	3	10.1039/C3RA43486A		ZIF-71	6FDA-Durene	30 wt%	35	3.5	Single	11.5	7750	10.1016/j.memsci.2014.05.025
	MIL-53	6DFA-ODA:DAM (1:1)	20 wt%	35	10.3	Single	12.5	61.5	10.1039/C3RA43486A		ZIF-8	Pebax-2533	5 wt%	RT	2	Single	29.6	397	10.1016/j.memsci.2014.02.002
	MIL-53-NH2	6DFA-ODA:DAM (1:1)	10 wt%	35	10.3	Single	34.1	51.2	10.1039/C3RA43486A		ZIF-8	Pebax-2533	10 wt%	RT	2	Single	31.4	433	10.1016/j.memsci.2014.02.002
	MIL-53-NH2	6DFA-ODA:DAM (1:1)	20 wt%	35	10.3	Single	15.1	52.6	10.1039/C3RA43486A		ZIF-8	Pebax-2533	15 wt%	RT	2	Single	30.3	508	10.1016/j.memsci.2014.02.002
	MIL-53-NH2	6DFA-ODA:DAM (1:1)	22 wt%	35	10.3	Single	12.5	50	10.1039/C3RA43486A		ZIF-8	Pebax-2533	20 wt%	RT	2	Single	28.9	843	10.1016/j.memsci.2014.02.002
	MIL-53	6DFA-ODA:DAM (1:4)	25 wt%	35	10.3	Single	18.1	123	10.1039/C3RA43486A		ZIF-8	Pebax-2533	25 wt%	RT	2	Single	31.3	1129	10.1016/j.memsci.2014.02.002
	MIL-53-NH2	6DFA-ODA:DAM (1:4)	10 wt%	35	10.3	Single	25.8	112	10.1039/C3RA43486A		ZIF-8	Pebax-2533	30 wt%	RT	2	Single	31.6	1220	10.1016/j.memsci.2014.02.002
	MIL-53-NH2	6DFA-ODA:DAM (1:4)	15 wt%	35	10.3	Single	28.2	113	10.1039/C3RA43486A		ZIF-8	Pebax-2533	35 wt%	RT	2	Single	32.3	1287	10.1016/j.memsci.2014.02.002
	MIL-53-NH2	6DFA-ODA:DAM (1:4)	20 wt%	35	10.3	Single	14.1	115	10.1039/C3RA43486A		Cd-6F	6FDA-ODA	10 wt%	25	2	Single	35.1	37.8	10.1021/am500081e
	ZIF-8	PIM-1	11 vol%	RT	1	Single	15	4815	10.1016/j.memsci.2012.09.035		PEG-PEI-GO	Pebax MH 1657	10 wt%	25	2	10/90	120	1330	10.1021/acsami.5b00106
	ZIF-8	PIM-1	28 vol%	RT	1	Single	18.6	4270	10.1016/j.memsci.2012.09.035		PEI@MIL-101(Cr)	SPEEK	40 wt%	25	1	Single	80	2490	10.1021/am504742q
	ZIF-8	PIM-1	36 vol%	RT	1	Single	13.4	6820	10.1016/j.memsci.2012.09.035		HKUST-1/[emim][Ac]	Chitosan	10 wt%	50	2	Single	19.3	4754	10.1039/C5RA19331A
	ZIF-8	PIM-1	43 vol%	RT	1	Single	14.7	6300	10.1016/j.memsci.2012.09.035		NH2-UiO-66	Matrimid 5218	23 wt%	RT	1.4	Single	36.5	24	10.1039/C4TA05225K
	MIL-68(Al)	PSF	4 wt%	35	2.75	50/50	32.2	4.7	10.1039/c3ce40847g		NH2-UiO-66-PA	Matrimid 5218	23 wt%	RT	1.4	Single	37	29	10.1039/C4TA05225K
	MIL-68(Al)	PSF	8 wt%	35	2.75	50/50	36.5	4.7	10.1039/c3ce40847g		NH2-UiO-66-C10	Matrimid 5218	23 wt%	RT	1.4	Single	27	22.5	10.1039/C4TA05225K
	MIL-68(Al)	PSF	8 wt%	35	2.75	50/50	31.7	5.3	10.1039/c3ce40847g		NH2-UiO-66-SA	Matrimid 5218	23 wt%	RT	1.4	Single	30.5	20	10.1039/C4TA05225K
	MIL-68(Al)	PSF	8 wt%	35	2.75	50/50	27.7	6.1	10.1039/c3ce40847g		ZIF-8(S)	SEBS	30 wt%	35	0.13	Single	10.6	439.2	10.1016/j.memsci.2015.08.016
	Sonicated HKUST-1	PPO	10 wt%	30	ND	Single	21.5	87	10.1039/c3ta11131h		ZIF-8(M)	SEBS	30 wt%	35	0.13	Single	12	454.6	10.1016/j.memsci.2015.08.016
	Sonicated HKUST-1	PPO	20 wt%	30	ND	Single	22	107	10.1039/c3ta11131h		ZIF-8(L)	SEBS	30 wt%	35	0.13	Single	10.8	465.4	10.1016/j.memsci.2015.08.016
	Sonicated HKUST-1	PPO	30 wt%	30	ND	Single	31.5	108	10.1039/c3ta11131h		UiO-66	PIM-1	2.5 wt%	35	1	Single	24.8	4980	10.1038/srep07823
	Sonicated HKUST-1	PPO	40 wt%	30	ND	Single	32	114	10.1039/c3ta11131h		UiO-66	PIM-1	4.6 wt%	35	1	Single	21.3	5340	10.1038/srep07823
	ZIF-7	Pebax 1657	8 wt%	20	2.75	Single	23	145	10.1016/j.memsci.2012.09.006		UiO-66	PIM-1	10.7 wt%	35	1	Single	22.1	5150	10.1038/srep07823
	ZIF-7	Pebax 1657	22 wt%	20	2.75	Single	30	111	10.1016/j.memsci.2012.09.006		UiO-66	PIM-1	20.3 wt%	35	1	Single	21.8	4180	10.1038/srep07823
	ZIF-7	Pebax 1657	34 wt%	20	2.75	Single	44	41	10.1016/j.memsci.2012.09.006		ZIF-71	PIM-1	10 wt%	35	3.5	Single	19.4	4271	10.1039/C5TA03776J
	MSS-Z8	PSF	32 wt%	35	1	50/50	31	24.4	10.1016/j.memsci.2013.10.043		ZIF-71	PIM-1	20 wt%	35	3.5	Single	20	5942	10.1039/C5TA03776J
	ZIF-8	PBI-BuI	10 wt%	35	20	Single	54.2	2.8	10.1039/c4ta00611a		ZIF-71	PIM-1	30 wt%	35	3.5	Single	18.3	8377.1	10.1039/C5TA03776J
	ZIF-8	PBI-BuI	20 wt%	35	20	Single	47	3.83	10.1039/c4ta00611a		GO(5)/ZIF-302	PSF (dry)	6 wt%	25	-	Single	43.14	9.06	10.1016/j.jiec.2016.01.032
	ZIF-8	PBI-BuI	30 wt%	35	20	Single	43.6	5.23	10.1039/c4ta00611a		GO(4)/ZIF-302	PSF (dry)	12 wt%	25	-	Single	45.36	9.98	10.1016/j.jiec.2016.01.032
	ZIF-8	DMPBI-BuI	10 wt%	35	20	Single	42.2	6.7	10.1039/c4ta00611a		GO(3)/ZIF-302	PSF (dry)	18 wt%	25	-	Single	45.88	11.47	10.1016/j.jiec.2016.01.032
	ZIF-8	DMPBI-BuI	20 wt%	35	20	Single	32.4	9	10.1039/c4ta00611a		GO(2)/ZIF-302	PSF (dry)	24 wt%	25	-	Single	49.31	12.82	10.1016/j.jiec.2016.01.032
	ZIF-8	DMPBI-BuI	30 wt%	35	20	Single	15.7	53.9	10.1039/c4ta00611a		GO(1)/ZIF-302	PSF (dry)	30 wt%	25	-	Single	50.81	13.21	10.1016/j.jiec.2016.01.032
	ZIF-8	DBzPBI-BuI	10 wt%	35	20	Single	12.5	60.2	10.1039/c4ta00611a		GO(5)/ZIF-302	PSF (wet)	6 wt%	25	-	Single	43.19	9.07	10.1016/j.jiec.2016.01.032
	ZIF-8	DBzPBI-BuI	20 wt%	35	20	Single	11.6	89.8	10.1039/c4ta00611a		GO(4)/ZIF-302	PSF (wet)	12 wt%	25	-	Single	45.41	9.99	10.1016/j.jiec.2016.01.032
	MIL-53-NH2	PMP	30 wt%	30	8	Single	24.4	358.2	10.1039/C4RA07030E		GO(3)/ZIF-302	PSF (wet)	18 wt%	25	-	Single	45.96	11.49	10.1016/j.jiec.2016.01.032
	MIL-53-NH2	PMP	30 wt%	30	8	Single	22.8	339.5	10.1039/C4RA07030E		GO(2)/ZIF-302	PSF (wet)	24 wt%	25	-	Single	49.42	12.85	10.1016/j.jiec.2016.01.032
	MIL-53(Al)	Matrimid	5 wt%	35	3	Single	29.6	6.8	10.1016/j.cherd.2014.02.018		GO(1)/ZIF-302	PSF (wet)	30 wt%	25	-	Single	50.96	13.25	10.1016/j.jiec.2016.01.032
	MIL-53(Al)	Matrimid	10 wt%	35	3	Single	31	7.45	10.1016/j.cherd.2014.02.018		GO(1)/ZIF-301	PSF	30 wt%	25	-	Single	63	25	10.1016/j.memsci.2016.04.029
	MIL-53(Al)	Matrimid	15 wt%	35	3	Single	51.8	12.43	10.1016/j.cherd.2014.02.018		ZIF-8@GO	Pebax	6 wt%	25	1	Single	47.6	249	10.1016/j.memsci.2016.08.043
	MIL-53(Al)	Matrimid	20 wt%	35	3	Single	15.1	14.52	10.1016/j.cherd.2014.02.018		TSIL-modified NH2-MIL-101(Cr)	PIM-1	5 wt%	25	3	Single	37	2979	10.1039/C6TA02611G
	NH2-MIL-53(Al)	Matrimid 5218	25 wt%	35	3	50/50	40	14.5	10.1002/adfm.201203462		Mg-MOF-74	PIM-1	10 wt%	25	2	Single	21.2	9400	10.1016/j.memsci.2016.08.045
	MIL-53-as	Matrimid	37.5 wt%	35	2	Single	90.1	40	10.1016/j.micromeso.2014.05.006		Mg-MOF-74	PIM-1	15 wt%	25	2	Single	29.5	15064	10.1016/j.memsci.2016.08.045
	MIL-53-ht	Matrimid	37.5 wt%	35	2	Single	47	51	10.1016/j.micromeso.2014.05.006		Mg-MOF-74	PIM-1	20 wt%	25	2	Single	28.7	21269	10.1016/j.memsci.2016.08.045
	MIL-53-ht	Matrimid	33.3 wt%	35	2	Single	45.7	26.6	10.1016/j.micromeso.2014.05.006		UiO-66	Pebax 1657	10 wt%	25	3	50/50	56.5	96.3	10.1016/j.memsci.2016.04.045
	NH2-MIL-53(Al)	PSF	25 wt%	35	3	50/50	27.5	5.6	10.1016/j.micromeso.2013.08.049		UiO-66	Pebax 1657	10 wt%	25	3	50/50	66.1	87	10.1016/j.memsci.2016.04.045
	NH2-MIL-101(Al)	PSF	25 wt%	35	3	50/50	29	8.8	10.1016/j.micromeso.2013.08.049		ZIF-11	Pebax 2533	70 wt%	20	2	Single	28	402.9	10.1016/j.jtice.2016.07.005
	NH2-MIL-53(Al)	Matrimid 5218	20 wt%	35	3	50/50	43.5	8.8	10.1016/j.micromeso.2013.08.049		TSIL@NH2-MIL-101(Cr)	PIM-1	5 wt%	25	3	Single	37	2979	10.1039/C6TA02611G
	NH2-MIL-101(Al)	Matrimid 5218	8 wt%	35	3	50/50	35	10.1	10.1016/j.micromeso.2013.08.049		NH2-MIL-53(Al)	6FDA-DAM	20 wt%	25	1	15/85	26.3	737	10.1002/adfm.201505352
	ZIF-8	Pebax-2533	5 wt%	RT	2	Single	8.1	397	10.1016/j.memsci.2014.02.002		UiO-66-NH2	PSF	40 wt%	35	3	Single	26	46	10.1039/c5ee02660a
	ZIF-8	Pebax-2533	10 wt%	RT	2	Single	8.5	433	10.1016/j.memsci.2014.02.002		[bmim][Tf2N]@ZIF-8	Pebax 1657	15 wt%	25	1	Single	83.9	104.9	10.1016/j.memsci.2016.03.050
	ZIF-8	Pebax-2533	15 wt%	RT	2	Single	10.4	508	10.1016/j.memsci.2014.02.002		ZIF-8	PIM-1	5 wt%	22	4	Single	20.7	5223	10.1039/C5TA09060A
	ZIF-8	Pebax-2533	20 wt%	RT	2	Single	9.2	843	10.1016/j.memsci.2014.02.002		ZIF-8	PIM-1	10 wt%	22	4	Single	21	5928	10.1039/C5TA09060A
	ZIF-8	Pebax-2533	25 wt%	RT	2	Single	8.5	1129	10.1016/j.memsci.2014.02.002		ZIF-8	PIM-1	20 wt%	22	4	Single	21.7	6342	10.1039/C5TA09060A
	ZIF-8	Pebax-2533	30 wt%	RT	2	Single	8.7	1220	10.1016/j.memsci.2014.02.002		ZIF-8	PIM-1	30 wt%	22	4	Single	21.1	6424	10.1039/C5TA09060A
	ZIF-8	Pebax-2533	35 wt%	RT	2	Single	9	1287	10.1016/j.memsci.2014.02.002		ZIF-8	TOX-PIM-1	5 wt%	22	4	Single	27.5	2745	10.1039/C5TA09060A
	ZIF-8-ambz-(30)	Matrimid 5218	15 wt%	35	3.45	Single	38.5	10.4	10.1016/j.micromeso.2013.06.036		ZIF-8	TOX-PIM-1	10 wt%	22	4	Single	27.1	3199	10.1039/C5TA09060A
	Cd-6F	6FDA-ODA	10 wt%	25	2.03	Single	44.8	37.8	10.1021/am500081e		ZIF-8	TOX-PIM-1	20 wt%	22	4	Single	28.3	3944	10.1039/C5TA09060A
	Fe(BTC)	Matrimid 5218	10 wt%	35	5	50/50	22	8.75	10.1016/j.memsci.2014.02.009		HKUST-1/[Emim][Tf2N]	6FDA-Durene	10 wt%	25	2.03	Single	27.1	1101	10.1021/acsami.6b11074
	Fe(BTC)	Matrimid 5218	20 wt%	35	5	50/50	25	10.25	10.1016/j.memsci.2014.02.009		HKUST-1/[Emim][Tf2N]	6FDA-Durene	10 wt%	25	2.03	Single	17.9	145	10.1021/acsami.6b11074
	Fe(BTC)	Matrimid 5218	30 wt%	35	5	50/50	27	12	10.1016/j.memsci.2014.02.009		NH2-UiO-66	PAO-PIM-1	7 wt%	35	1	Single	30	3825	10.1039/c7ta01773a
	ZIF-71	6FDA-Durene	10 wt%	35	3.5	Single	16.1	1805	10.1016/j.memsci.2014.05.025		NH2-UiO-66	PAO-PIM-1	15 wt%	35	1	Single	28.9	4832	10.1039/c7ta01773a
	ZIF-71	6FDA-Durene	20 wt%	35	3.5	Single	12.8	4006	10.1016/j.memsci.2014.05.025		NH2-UiO-66	PAO-PIM-1	30 wt%	35	1	Single	27.5	8425	10.1039/c7ta01773a
	ZIF-71	6FDA-Durene	30 wt%	35	3.5	Single	9.53	7750	10.1016/j.memsci.2014.05.025		UiO-66	PAO-PIM-1	30 wt%	35	1	Single	22.5	8126	10.1039/c7ta01773a
	ZIF-71	6FDA-Durene	10 wt%	35	7.1	50/50	20	1606	10.1016/j.memsci.2014.05.025		UiO-66	PIM-1	30 wt%	35	1	Single	15.6	9420	10.1039/c7ta01773a
	ZIF-71	6FDA-Durene	20 wt%	35	7.1	50/50	16	3435	10.1016/j.memsci.2014.05.025		UiO-66	PIM-1	5 wt%	25	4	Single	16.2	4620	10.1038/nenergy.2017.86
	ZIF-71	6FDA-Durene	30 wt%	35	7.1	50/50	9.2	5642	10.1016/j.memsci.2014.05.025		UiO-66	PIM-1	10 wt%	25	4	Single	16.5	5210	10.1038/nenergy.2017.86
	H_ZIF-8	PVC-g-POEM	10 wt%	35	1	Single	12.2	170.1	10.1016/j.memsci.2015.01.038		UiO-66	PIM-1	20 wt%	25	4	Single	13	6981	10.1038/nenergy.2017.86
	H_ZIF-8	PVC-g-POEM	20 wt%	35	1	Single	10.8	495.4	10.1016/j.memsci.2015.01.038		UiO-66-H	PIM-1	5 wt%	25	4	Single	22.9	2765	10.1038/nenergy.2017.86
	H_ZIF-8	PVC-g-POEM	30 wt%	35	1	Single	11.2	623	10.1016/j.memsci.2015.01.038		UiO-66-H	PIM-1	10 wt%	25	4	Single	23.5	2631	10.1038/nenergy.2017.86
	CNT-MIL	6FDA-Durene	5 wt%	25	2	50/50	29.7	818	10.1021/acsami.5b02680		UiO-66-H	PIM-1	20 wt%	25	4	Single	24.6	2606	10.1038/nenergy.2017.86
	PEG-PEI-GO	Pebax MH 1657	10 wt%	25	2	30/70	45	1330	10.1021/acsami.5b00106		UiO-66-H	PIM-1	30 wt%	25	4	Single	18.3	1880	10.1038/nenergy.2017.86
	PEI@MIL-101(Cr)	SPEEK	40 wt%	25	1	Single	71.8	2490	10.1021/am504742q		UiO-66-H	PIM-1	40 wt%	25	4	Single	21.4	1023	10.1038/nenergy.2017.86
	NH2-MIL-101	6FDA-Durene	10 wt%	25	2	-	14.1	1365	10.1021/acsami.5b02680		UiO-66-NH2	PIM-1	5 wt%	25	4	Single	26.9	2952	10.1038/nenergy.2017.86
	UiO-66	PIM-1	2.5 wt%	35	1	Single	16.6	4980	10.1038/srep07823		UiO-66-NH2	PIM-1	10 wt%	25	4	Single	27.5	2869	10.1038/nenergy.2017.86
	UiO-66	PIM-1	4.6 wt%	35	1	Single	17.2258	5340	10.1038/srep07823		UiO-66-NH2	PIM-1	20 wt%	25	4	Single	23.7	2210	10.1038/nenergy.2017.86
	UiO-66	PIM-1	10.7 wt%	35	1	Single	14.3056	5150	10.1038/srep07823		UiO-66-NH2	PIM-1	30 wt%	25	4	Single	22	2005	10.1038/nenergy.2017.86
	UiO-66	PIM-1	20.3 wt%	35	1	Single	12.6667	4180	10.1038/srep07823		UiO-66-NH2	PIM-1	40 wt%	25	4	Single	24	1727	10.1038/nenergy.2017.86
	NH2-MIL-125(Ti)	PSF	10 wt%	30	3	50/50	28.3	18.5	10.1016/j.memsci.2015.01.007		UiO-66-Br	PIM-1	5 wt%	25	4	Single	20.1	2890	10.1038/nenergy.2017.86
	NH2-MIL-125(Ti)	PSF	20 wt%	30	3	50/50	29.5	29.3	10.1016/j.memsci.2015.01.007		UiO-66-Br	PIM-1	10 wt%	25	4	Single	21.6	2846	10.1038/nenergy.2017.86
	NH2-MIL-125(Ti)	PSF	30 wt%	30	3	50/50	29.2	40	10.1016/j.memsci.2015.01.007		UiO-66-Br	PIM-1	20 wt%	25	4	Single	19.3	2416	10.1038/nenergy.2017.86
	NH2-MIL-53(Al)	6FDA-DAM-HAB (FDH-11)	10 wt%	35	150 psi	Single	78.5	47.1	10.1039/C5TA01597A		UiO-66-Br	PIM-1	30 wt%	25	4	Single	19	2294	10.1038/nenergy.2017.86
	NH2-MIL-53(Al)	6FDA-DAM-HAB (FDH-11)	15 wt%	35	150 psi	Single	58.4	46.7	10.1039/C5TA01597A		UiO-66-Br	PIM-1	40 wt%	25	4	Single	23.6	1441	10.1038/nenergy.2017.86
	NH2-MIL-53(Al)	6FDA-DAM-HAB (FDH-11)	20 wt%	35	150 psi	Single	27.7	44.3	10.1039/C5TA01597A		ZIF-8	Pebax	20 wt%	25	3	Single	41.1	200	10.1016/j.memsci.2016.11.048
	NH2-UiO-66	Matrimid 9725	30 wt%	35	9	50/50	37.3	17.8	10.1021/acsami.5b08964		MMIF	Matrimid	10 wt%	35	4	Single	27.3	8.1	10.1021/acsami.7b13054
	NH2-UiO-66-BA	Matrimid 9725	30 wt%	35	9	50/50	39.3	17.4	10.1021/acsami.5b08964		MMIF	Matrimid	20 wt%	35	4	Single	27	8.65	10.1021/acsami.7b13054
	NH2-UiO-66-ABA	Matrimid 9725	30 wt%	35	9	50/50	47.7	37.9	10.1021/acsami.5b08964		MMIF	Matrimid	10 wt%	35	4	50/50	38.9	8.17	10.1021/acsami.7b13054
	UiO-66	Matrimid 9725	30 wt%	35	9	50/50	35.8	15.7	10.1021/acsami.5b08964		MMIF	Matrimid	20 wt%	35	4	50/50	58	11.7	10.1021/acsami.7b13054
	UiO-66-BA	Matrimid 9725	30 wt%	35	9	50/50	42.9	17.8	10.1021/acsami.5b08964		NH2-MIL-53(Al)	Cellulose acetate	15 wt%	25	3	Single	23.4	52.6	10.1016/j.seppur.2018.01.038
	UiO-66-ABA	Matrimid 9725	30 wt%	35	9	50/50	45.1	13.6	10.1021/acsami.5b08964		Mg2(dobdc)	6FDA-Durene	50 wt%	35	1	Single	28	157	10.1021/acs.chemmater.7b02908
	ZIF-8(S)	SEBS	30 wt%	35	100 Torr	Single	5.2	439.2	10.1016/j.memsci.2015.08.016		FeBTC	Matrimid 5218	10 wt%	30	0.7	Single	7.5	29.8	10.1016/j.seppur.2018.03.028
	ZIF-8(M)	SEBS	30 wt%	35	100 Torr	Single	5.4	454.6	10.1016/j.memsci.2015.08.016		FeBTC	Matrimid 5218	20 wt%	30	0.7	Single	6.1	77.2	10.1016/j.seppur.2018.03.028
	ZIF-8(L)	SEBS	30 wt%	35	100 Torr	Single	5.2	465.4	10.1016/j.memsci.2015.08.016		FeBTC	Matrimid 5218	30 wt%	30	0.7	Single	6.0	94.2	10.1016/j.seppur.2018.03.028
	ZIF-8	Matrimid 5218	10 wt%	35	5	50/50	44	14	10.1016/j.memsci.2015.05.015		FeBTC	Matrimid 5218	10 wt%	50	0.7	Single	10.1	48.3	10.1016/j.seppur.2018.03.028
	ZIF-8	Matrimid 5218	20 wt%	35	5	50/50	48	18.5	10.1016/j.memsci.2015.05.015		FeBTC	Matrimid 5218	20 wt%	50	0.7	Single	5.7	91.9	10.1016/j.seppur.2018.03.028
	ZIF-8	Matrimid 5218	30 wt%	35	5	50/50	52.5	25	10.1016/j.memsci.2015.05.015		FeBTC	Matrimid 5218	30 wt%	50	0.7	Single	4.7	109.6	10.1016/j.seppur.2018.03.028
	ZIF-8	Matrimid 5218	40 wt%	35	5	50/50	42.5	45	10.1016/j.memsci.2015.05.015		FeBTC	Matrimid 5218	10 wt%	80	0.7	Single	43.5	84.9	10.1016/j.seppur.2018.03.028
	ns-CuBDC	PI	8 wt%	25	3	Single	78.7	4.09	10.1038/nmat4113		FeBTC	Matrimid 5218	20 wt%	80	0.7	Single	15.4	91.2	10.1016/j.seppur.2018.03.028
	ZIF-71	PIM-1	10 wt%	35	3.5	Single	11.3	4271	10.1039/C5TA03776J		FeBTC	Matrimid 5218	30 wt%	80	0.7	Single	23.1	217.9	10.1016/j.seppur.2018.03.028
	ZIF-71	PIM-1	20 wt%	35	3.5	Single	11.9	5942	10.1039/C5TA03776J		ZIF-94	6FDA-DAM	10 wt%	25	1	15/85	24.5	930	10.1016/j.memsci.2017.12.033
	ZIF-71	PIM-1	30 wt%	35	3.5	Single	11.2	8377.1	10.1039/C5TA03776J		ZIF-94	6FDA-DAM	20 wt%	25	1	15/85	22.6	1140	10.1016/j.memsci.2017.12.033
	ZIF-71	PIM-1 (photooxidized)	20 wt%	35	3.5	50/50	32.8	2224.3	10.1039/C5TA03776J		ZIF-94	6FDA-DAM	30 wt%	25	1	15/85	20.5	1225	10.1016/j.memsci.2017.12.033
	ZIF-71	PIM-1 (photooxidized)	20 wt%	35	3.5	30/70	32.2	1904.5	10.1039/C5TA03776J		ZIF-94	6FDA-DAM	40 wt%	25	1	15/85	22.2	2310	10.1016/j.memsci.2017.12.033
	ZIF-71	PIM-1 (photooxidized)	30 wt%	35	3.5	50/50	28.8	3020	10.1039/C5TA03776J		ZIF-94	6FDA-DAM	10 wt%	25	2	15/85	24.8	865	10.1016/j.memsci.2017.12.033
	ZIF-71	PIM-1 (photooxidized)	30 wt%	35	3.5	30/70	28.3	2629.1	10.1039/C5TA03776J		ZIF-94	6FDA-DAM	20 wt%	25	2	15/85	22.9	1070	10.1016/j.memsci.2017.12.033
	Ni2(dobdc)	Cellulose acetate	23 wt%	35	1	Single	30.3	3.78	10.1039/C6EE00865H		ZIF-94	6FDA-DAM	30 wt%	25	2	15/85	19.7	1125	10.1016/j.memsci.2017.12.033
	Ni2(dobdc)	Matrimid	23 wt%	35	1	Single	29.5	9.31	10.1039/C6EE00865H		ZIF-94	6FDA-DAM	40 wt%	25	2	15/85	22.4	2165	10.1016/j.memsci.2017.12.033
	Ni2(dobdc)	6FDA-DAT	15 wt%	35	1	Single	51.9	63.9	10.1039/C6EE00865H		ZIF-94	6FDA-DAM	10 wt%	25	4	15/85	24.7	780	10.1016/j.memsci.2017.12.033
	Ni2(dobdc)	6FDA-DAM-DAT	18 wt%	35	1	Single	30.5	220	10.1039/C6EE00865H		ZIF-94	6FDA-DAM	20 wt%	25	4	15/85	23.6	960	10.1016/j.memsci.2017.12.033
	Ni2(dobdc)	6FDA-DAM	23 wt%	35	1	Single	14.5	715	10.1039/C6EE00865H		ZIF-94	6FDA-DAM	30 wt%	25	4	15/85	17.8	1000	10.1016/j.memsci.2017.12.033
	Ni2(dobdc)	6FDA-Durene	21 wt%	35	1	Single	12.3	1035	10.1039/C6EE00865H		ZIF-94	6FDA-DAM	40 wt%	25	4	15/85	22.9	2000	10.1016/j.memsci.2017.12.033
	Mg-MOF-74	PIM-1	10 wt%	25	2	Single	14.3	9400	10.1016/j.memsci.2016.08.045		NH2-UiO-66	PIM-1	20 wt%	25	2	Single	54.2	12498	10.1016/j.memsci.2017.11.054
	Mg-MOF-74	PIM-1	15 wt%	25	2	Single	17.4	15064	10.1016/j.memsci.2016.08.045		UiO-66	Matrimid 5218	10 wt%	35	4	Single	29.4	7.8	10.1039/c8ta03553a
	Mg-MOF-74	PIM-1	20 wt%	25	2	Single	19.1	21269	10.1016/j.memsci.2016.08.045		Azo-UiO-66	Matrimid 5218	5 wt%	35	4	Single	35	7.1	10.1039/c8ta03553a
	MIL-125	Matrimid® 9725	15 wt%	35	9	50/50	44	18	10.1016/j.memsci.2015.12.022		Azo-UiO-66	Matrimid 5218	10 wt%	35	4	Single	37	10	10.1039/c8ta03553a
	MIL-125	Matrimid® 9725	30 wt%	35	9	50/50	37	27	10.1016/j.memsci.2015.12.022		Azo-UiO-66	Matrimid 5218	20 wt%	35	4	Single	40	13	10.1039/c8ta03553a
	NH2-MIL-125	Matrimid® 9725	15 wt%	35	9	50/50	50	17	10.1016/j.memsci.2015.12.022		HKUST-1	Pebax® PEBA	3 wt%	25	1	Single	55.13	119.3	10.3390/ma11081421
	NH2-MIL-125	Matrimid® 9725	30 wt%	35	9	50/50	37	50	10.1016/j.memsci.2015.12.022		NH2-HKUST-1	Pebax® PEBA	3 wt%	25	1	Single	60.88	86.58	10.3390/ma11081421
	NP-NH2-MIL-53(Al)	6FDA-DAM	20 wt%	25	3	50/50	28	660	10.1002/adfm.201505352		sub-NH2-HKUST-1	Pebax® PEBA	3 wt%	25	1	Single	66.27	108.5	10.3390/ma11081421
	UiO-66-NH2	PSF	40 wt%	35	3	Single	24	46	10.1039/c5ee02660a		Azo-UiO-66	Matrimid 5218	5 wt%	35	4	Single	35	7.1	10.1039/C8TA03553A
	[bmim][Tf2N]@ZIF-8	Pebax 1657	15 wt%	25	1	Single	34.8	104.9	10.1016/j.memsci.2016.03.050		Azo-UiO-66	Matrimid 5218	10 wt%	35	4	Single	37	10	10.1039/C8TA03553A
	ZIF-8	PIM-1	5 wt%	22	4	Single	16.9	5223	10.1039/C5TA09060A		Azo-UiO-66	Matrimid 5218	20 wt%	35	4	Single	40	13	10.1039/C8TA03553A
	ZIF-8	PIM-1	10 wt%	22	4	Single	16.9	5928	10.1039/C5TA09060A		ZIF-94	Pebax	25 wt%	22	1	15/85	70	58.5	10.1002/chem.201800253
	ZIF-8	PIM-1	20 wt%	22	4	Single	14.9	6342	10.1039/C5TA09060A		MIL-53(Al)	Pebax	5 wt%	35	10	Single	59.2	127.4	10.1016/j.seppur.2018.02.038
	ZIF-8	PIM-1	30 wt%	22	4	Single	17.4	6424	10.1039/C5TA09060A		MIL-53(Al)	Pebax	10 wt%	35	10	Single	59.4	129	10.1016/j.seppur.2018.02.038
	ZIF-8	TOX-PIM-1	5 wt%	22	4	Single	37.6	2745	10.1039/C5TA09060A		MIL-53(Al)	Pebax	15 wt%	35	10	Single	48.4	105.4	10.1016/j.seppur.2018.02.038
	ZIF-8	TOX-PIM-1	10 wt%	22	4	Single	30.7	3199	10.1039/C5TA09060A		MIL-53(Al)	Pebax	20 wt%	35	10	Single	49.9	95.7	10.1016/j.seppur.2018.02.038
	ZIF-8	TOX-PIM-1	20 wt%	22	4	Single	26.8	3944	10.1039/C5TA09060A		NH2-MIL-53(Al)	Pebax	5 wt%	35	10	Single	59.3	134.6	10.1016/j.seppur.2018.02.038
	HKUST-1/[Emim][Tf2N]	6DFA-durene	10 wt%	25	2.03	Single	29.3	1101	10.1021/acsami.6b11074		NH2-MIL-53(Al)	Pebax	10 wt%	35	10	Single	55.5	149.1	10.1016/j.seppur.2018.02.038
	HKUST-1/[Emim][Tf2N]	6FDA-Durene	10 wt%	25	2.03	Single	19.6	145	10.1021/acsami.6b11074		NH2-MIL-53(Al)	Pebax	15 wt%	35	10	Single	51.7	125.6	10.1016/j.seppur.2018.02.038
	MIL-125	Matrimid 9725	15 wt%	35	9	50/50	44	18	10.1016/j.memsci.2015.12.022		NH2-MIL-53(Al)	Pebax	20 wt%	35	10	Single	42.9	63.3	10.1016/j.seppur.2018.02.038
	MIL-125	Matrimid 9725	30 wt%	35	9	50/50	37	27	10.1016/j.memsci.2015.12.022		NH2-MIL-53(Al)	PEG	47.4 wt%	35	3	Single	35	2700	10.1002/anie.201804162
	NH2-MIL-125	Matrimid 9725	15 wt%	35	9	50/50	50	17	10.1016/j.memsci.2015.12.022		UiO-66@GO	PI	5 wt%	25	3	Single	35.6	3.56	10.1016/j.seppur.2018.12.029
	NH2-MIL-125	Matrimid 9725	30 wt%	35	9	50/50	37	50	10.1016/j.memsci.2015.12.022		UiO-66-NH2	PI	5 wt%	25	3	Single	13	8.45	10.1016/j.seppur.2018.12.029
	ZIF-8	Pebax 1657	8 wt%	25	8	Single	40	655	10.1016/j.memsci.2016.11.065		UiO-66-NH2@GO	PI	1 wt%	25	3	Single	29.2	3.12	10.1016/j.seppur.2018.12.029
	UiO-66-GO	PI	24 wt%	30	3.4	50/50	51	21	10.1016/j.memsci.2016.12.041		UiO-66-NH2@GO	PI	5 wt%	25	3	Single	52	7.28	10.1016/j.seppur.2018.12.029
	ZIF-11	6FDA-DAM	20 wt%	30	4	Single	31.02	257.5	10.1016/j.seppur.2016.09.037		UiO-66-NH2@GO	PI	10 wt%	25	3	Single	30.5	7.33	10.1016/j.seppur.2018.12.029
	NH2-UiO-66	PAO-PIM-1	7 wt%	35	1	Single	24.3	3825	10.1039/c7ta01773a		UiO-66-NH2@GO	PI	20 wt%	25	3	Single	2	18.1	10.1016/j.seppur.2018.12.029
	NH2-UiO-66	PAO-PIM-1	15 wt%	35	1	Single	22.9	4832	10.1039/c7ta01773a		ZIF-8 (90 nm)	Pebax	5 wt%	20	1	Single	59.6	99.7	10.1016/j.seppur.2018.04.010
	NH2-UiO-66	PAO-PIM-1	30 wt%	35	1	Single	23	8425	10.1039/c7ta01773a		ZIF-8 @GO	Ethyl cellulose	20 wt%	25	2	Single	33.4	203.3	10.1016/j.seppur.2018.04.080
	UiO-66	PAO-PIM-1	30 wt%	35	1	Single	18.4	8126	10.1039/c7ta01773a		HKUST-1 w. inter- connected branches	6FDA-DAM	10 wt%	35	1.03	Single	17.8	1600	10.1002/cssc.201900623
	UiO-66	PIM-1	30 wt%	35	1	Single	12.3	9420	10.1039/c7ta01773a		HKUST-1 w. inter- connected branches	6FDA-DAM	20 wt%	35	1.03	Single	16.4	1920	10.1002/cssc.201900623
	UiO-66	PIM-1	5 wt%	25	4	Single	15.1	4620	10.1038/nenergy.2017.86		HKUST-1 w. inter- connected branches	6FDA-DAM	30 wt%	35	1.03	Single	16.3	2480	10.1002/cssc.201900623
	UiO-66	PIM-1	10 wt%	25	4	Single	13.7	5210	10.1038/nenergy.2017.86		HKUST-1 bulk	6FDA-DAM	10 wt%	35	1.03	Single	17.7	1450	10.1002/cssc.201900623
	UiO-66	PIM-1	20 wt%	25	4	Single	9.3	6981	10.1038/nenergy.2017.86		HKUST-1 bulk	6FDA-DAM	20 wt%	35	1.03	Single	15.1	1690	10.1002/cssc.201900623
	UiO-66-H	PIM-1	5 wt%	25	4	Single	18.2	2765	10.1038/nenergy.2017.86		HKUST-1 bulk	6FDA-DAM	30 wt%	35	1.03	Single	14.6	2360	10.1002/cssc.201900623
	UiO-66-H	PIM-1	10 wt%	25	4	Single	18.8	2631	10.1038/nenergy.2017.86		MIL-101A	PIM-1A	9.1 wt%	25	1	Single	21.6	3570	10.1016/j.seppur.2018.11.055
	UiO-66-H	PIM-1	20 wt%	25	4	Single	20.1	2606	10.1038/nenergy.2017.86		MIL-101A	PIM-1A	16.6 wt%	25	1	Single	19.3	9950	10.1016/j.seppur.2018.11.055
	UiO-66-H	PIM-1	30 wt%	25	4	Single	16.1	1880	10.1038/nenergy.2017.86		MIL-101A	PIM-1A	28.6 wt%	25	1	Single	15.4	22000	10.1016/j.seppur.2018.11.055
	UiO-66-H	PIM-1	40 wt%	25	4	Single	15.8	1023	10.1038/nenergy.2017.86		MIL-101B	PIM-1B	9.1 wt%	25	1	Single	21.9	4080	10.1016/j.seppur.2018.11.055
	UiO-66-NH2	PIM-1	5 wt%	25	4	Single	27.3	2952	10.1038/nenergy.2017.86		MIL-101B	PIM-1B	16.6 wt%	25	1	Single	21.1	8960	10.1016/j.seppur.2018.11.055
	UiO-66-NH2	PIM-1	10 wt%	25	4	Single	28.3	2869	10.1038/nenergy.2017.86		MIL-101B	PIM-1B	28.6 wt%	25	1	Single	20.3	7550	10.1016/j.seppur.2018.11.055
	UiO-66-NH2	PIM-1	20 wt%	25	4	Single	25.1	2210	10.1038/nenergy.2017.86		NanoMIL-101	PIM-1A	9.1 wt%	25	1	Single	21.3	2830	10.1016/j.seppur.2018.11.055
	UiO-66-NH2	PIM-1	30 wt%	25	4	Single	23.8	2005	10.1038/nenergy.2017.86		NanoMIL-101	PIM-1A	16.6 wt%	25	1	Single	19.5	5940	10.1016/j.seppur.2018.11.055
	UiO-66-NH2	PIM-1	40 wt%	25	4	Single	21.8	1727	10.1038/nenergy.2017.86		NanoMIL-101	PIM-1A	23.1 wt%	25	1	Single	19.9	8310	10.1016/j.seppur.2018.11.055
	UiO-66-Br	PIM-1	5 wt%	25	4	Single	18.1	2890	10.1038/nenergy.2017.86		NanoMIL-101	PIM-1A	28.6 wt%	25	1	Single	19.3	10600	10.1016/j.seppur.2018.11.055
	UiO-66-Br	PIM-1	10 wt%	25	4	Single	17.1	2846	10.1038/nenergy.2017.86		ED-MIL-101	PIM-1B	9.1 wt%	25	1	Single	19.7	5900	10.1016/j.seppur.2018.11.055
	UiO-66-Br	PIM-1	20 wt%	25	4	Single	16.3	2416	10.1038/nenergy.2017.86		ED-MIL-101	PIM-1B	16.6 wt%	25	1	Single	19.1	4510	10.1016/j.seppur.2018.11.055
	UiO-66-Br	PIM-1	30 wt%	25	4	Single	17.1	2294	10.1038/nenergy.2017.86		ED-MIL-101	PIM-1B	23.1 wt%	25	1	Single	17.1	4760	10.1016/j.seppur.2018.11.055
	UiO-66-Br	PIM-1	40 wt%	25	4	Single	20.8	1441	10.1038/nenergy.2017.86		ED-MIL-101	PIM-1B	28.6 wt%	25	1	Single	16.4	3040	10.1016/j.seppur.2018.11.055
	CuBTC	Pebax® PEBA	5 g/g	30	3	Single	17.7	91.4	10.1002/cjce.22857		NH2-MIL-101	PIM-1B	9.1 wt%	25	1	Single	20	7230	10.1016/j.seppur.2018.11.055
	CuBTC	Pebax® PEBA	5 g/g	30	3	50/50	16.8	91.1	10.1002/cjce.22857		NH2-MIL-101	PIM-1B	16.6 wt%	25	1	Single	19.7	6550	10.1016/j.seppur.2018.11.055
	CuBTC	Pebax® PEBA	10 g/g	30	3	Single	19	102.7	10.1002/cjce.22857		NH2-MIL-101	PIM-1B	23.1 wt%	25	1	Single	17.3	6800	10.1016/j.seppur.2018.11.055
	CuBTC	Pebax® PEBA	10 g/g	30	3	50/50	17.3	106.2	10.1002/cjce.22857		MIL-101A	PIM-1A	9.1 wt%	25	1	Single	18.4	14600	10.1016/j.seppur.2018.11.055
	CuBTC	Pebax® PEBA	15 g/g	30	3	Single	20.5	128.8	10.1002/cjce.22857		MIL-101A	PIM-1A	16.6 wt%	25	1	Single	16.3	23500	10.1016/j.seppur.2018.11.055
	CuBTC	Pebax® PEBA	15 g/g	30	3	50/50	18.9	127.1	10.1002/cjce.22857		MIL-101A	PIM-1A	23.1 wt%	25	1	Single	20.6	22500	10.1016/j.seppur.2018.11.055
	CuBTC	Pebax® PEBA	20 g/g	30	3	Single	19.5	167.3	10.1002/cjce.22857		MIL-101A	PIM-1A	28.6 wt%	25	1	Single	15.3	35600	10.1016/j.seppur.2018.11.055
	CuBTC	Pebax® PEBA	20 g/g	30	3	50/50	18.4	158.9	10.1002/cjce.22857		MIL-101B	PIM-1B	9.1 wt%	25	1	Single	19.1	8390	10.1016/j.seppur.2018.11.055
	NH2-CuBTC	Pebax® PEBA	5 g/g	30	3	Single	18.4	93	10.1002/cjce.22857		MIL-101B	PIM-1B	16.6 wt%	25	1	Single	20	11600	10.1016/j.seppur.2018.11.055
	NH2-CuBTC	Pebax® PEBA	5 g/g	30	3	50/50	17.3	91.9	10.1002/cjce.22857		NanoMIL-101	PIM-1A	9.1 wt%	25	1	Single	16.7	8530	10.1016/j.seppur.2018.11.055
	NH2-CuBTC	Pebax® PEBA	10 g/g	30	3	Single	21	108.8	10.1002/cjce.22857		NanoMIL-101	PIM-1A	16.6 wt%	25	1	Single	17.3	13600	10.1016/j.seppur.2018.11.055
	NH2-CuBTC	Pebax® PEBA	10 g/g	30	3	50/50	18.8	113	10.1002/cjce.22857		NanoMIL-101	PIM-1A	23.1 wt%	25	1	Single	16.8	18800	10.1016/j.seppur.2018.11.055
	NH2-CuBTC	Pebax® PEBA	15 g/g	30	3	Single	23.6	135.2	10.1002/cjce.22857		NanoMIL-101	PIM-1A	28.6 wt%	25	1	Single	17.8	23200	10.1016/j.seppur.2018.11.055
	NH2-CuBTC	Pebax® PEBA	15 g/g	30	3	50/50	20.6	132.2	10.1002/cjce.22857		ED-MIL-101	PIM-1B	9.1 wt%	25	1	Single	13.2	8580	10.1016/j.seppur.2018.11.055
	NH2-CuBTC	Pebax® PEBA	20 g/g	30	3	Single	26.2	170.1	10.1002/cjce.22857		ED-MIL-101	PIM-1B	23.1 wt%	25	1	Single	19.1	8070	10.1016/j.seppur.2018.11.055
	NH2-CuBTC	Pebax® PEBA	20 g/g	30	3	50/50	23.1	163.7	10.1002/cjce.22857		ED-MIL-101	PIM-1B	28.6 wt%	25	1	Single	16.6	7470	10.1016/j.seppur.2018.11.055
	LaBTB	6FDA-DAM	10 wt%	30	3.5	50/50	30	725.2	10.1039/c7ta07261a		NH2-MIL-101	PIM-1B	9.1 wt%	25	1	Single	18.1	10430	10.1016/j.seppur.2018.11.055
	ZIF-8	Pebax	20 wt%	25	3	Single	15.1	200	10.1016/j.memsci.2016.11.048		NH2-MIL-101	PIM-1B	16.6 wt%	25	1	Single	17.1	10700	10.1016/j.seppur.2018.11.055
	MMIF	Matrimid	10 wt%	35	4	Single	36.9	8.1	10.1021/acsami.7b13054		NH2-MIL-101	PIM-1B	23.1 wt%	25	1	Single	21	10200	10.1016/j.seppur.2018.11.055
	MMIF	Matrimid	20 wt%	35	4	Single	34.6	8.65	10.1021/acsami.7b13054		MIL-101A	PIM-1A	28.6 wt%	25	1	15/85	26.9	3913	10.1016/j.seppur.2018.11.055
	MMIF	Matrimid	10 wt%	35	4	50/50	81	7.33	10.1021/acsami.7b13054		Bio-MOF-1	Polysulfone	30 wt%	25	10	Single	45.6	16.57	10.1016/j.seppur.2018.08.031
	MMIF	Matrimid	20 wt%	35	4	50/50	88	10.1	10.1021/acsami.7b13054		Bio-MOF-1	Polysulfone	30 wt%	25	10	50/50	41.5	15.05	10.1016/j.seppur.2018.08.031
	CuBTC/GO	PVDF	9.5/0.5 wt%	25	5	Single	66.32	3.316	10.1039/C8NJ00796A		UiO-66-CN	sPIM-1	20 wt%	25	1.4	50/50	53.5	12063.3	10.1002/adma.201806853
	NH2-MIL-53(Al)	Cellulose acetate	15 wt%	25	3	Single	28.7	52.6	10.1016/j.seppur.2018.01.038		UiO-66-CN	sPIM-1	20 wt%	25	1.4	Single	27	16121.3	10.1002/adma.201806853
	UiO-66	6FDA-BisP	6 wt%	35	2	50/50	33.6	56.7	10.1016/j.seppur.2017.10.039		UiO-66-CN	PIM-1	20 wt%	25	1.4	Single	26.7	7070.9	10.1002/adma.201806853
	UiO-66	6FDA-BisP	14 wt%	35	2	50/50	36.2	83.9	10.1016/j.seppur.2017.10.039		UiO-66-NH2	sPIM-1	20 wt%	25	1.4	Single	18	8619.5	10.1002/adma.201806853
	UiO-66	6FDA-BisP	17 wt%	35	2	50/50	41.9	108	10.1016/j.seppur.2017.10.039		MoS2	Pebax	4.67 wt%	25	1	Single	91	67	10.1016/j.memsci.2019.04.025
	UiO-66	6FDA-BisP	21 wt%	35	2	50/50	24.6	155	10.1016/j.seppur.2017.10.039		NH2-MIL-53(Al)	Tröger's base polymer	10 wt%	35	4	Single	21	187.6	10.1016/j.memsci.2018.12.004
	UiO-66	6FDA-ODA	4 wt%	35	2	50/50	38	30.1	10.1016/j.seppur.2017.10.039		NH2-MIL-53(Al)	Tröger's base polymer	20 wt%	35	4	Single	19.9	324.5	10.1016/j.memsci.2018.12.004
	UiO-66	6FDA-ODA	8 wt%	35	2	50/50	51.5	37.4	10.1016/j.seppur.2017.10.039		NH2-MIL-53(Al)	Tröger's base polymer	25 wt%	35	4	Single	19.1	138.8	10.1016/j.memsci.2018.12.004
	UiO-66	6FDA-ODA	17 wt%	35	2	50/50	57	43.3	10.1016/j.seppur.2017.10.039		NH2-MIL-53(Al)	Tröger's base polymer	30 wt%	35	4	Single	18.9	85.6	10.1016/j.memsci.2018.12.004
	UiO-66	6FDA-ODA	23 wt%	35	2	50/50	21.5	72	10.1016/j.seppur.2017.10.039		UiO-66-allyl	PDMS	50 wt%	RT	4	Single	1	20115	10.1021/acsami.9b02539
	UiO-66	6FDA-DAM	4 wt%	35	2	50/50	29.6	1283	10.1016/j.seppur.2017.10.039		UiO-66-allyl-C	PDMS	50 wt%	RT	4	Single	10	4573	10.1021/acsami.9b02539
	UiO-66	6FDA-DAM	8 wt%	35	2	50/50	32	1728	10.1016/j.seppur.2017.10.039		ZIF-8@GO	Pebax	20 wt%	25	3	Single	77.9	136.2	10.1016/j.memsci.2020.117934
	UiO-66	6FDA-DAM	14 wt%	35	2	50/50	30.9	1912	10.1016/j.seppur.2017.10.039		ZIF-7-OH	Pebax 2533	23 wt%	25	4.5	Single	13.7	323	10.1016/j.micromeso.2020.110030
	UiO-66	6FDA-DAM	21 wt%	35	2	50/50	12.7	2358	10.1016/j.seppur.2017.10.039		ZIF-7-OH	Pebax 2533	2 wt%	25	4.5	Single	32.5	249	10.1016/j.micromeso.2020.110030
	ZIF-7	Pebax-1074	10 wt%	30	3	Single	24	123	10.1080/10916466.2018.1458120		0D ZIF-8	Pebax	10 wt%	RT	2	10/90	32.5	380	10.1021/acs.iecr.0c01946
	KAUST-7	6FDA-Durene	33 wt%	35	2	50/50	33	1030	10.1016/j.memsci.2018.06.007		1D ZIF-8	Pebax	10 wt%	RT	2	10/90	30	400	10.1021/acs.iecr.0c01946
	NH2-UiO-66	PIM-1	20 wt%	25	2	Single	31.9	12498	10.1016/j.memsci.2017.11.054		2D ZIF-8	Pebax	5 wt%	RT	2	10/90	26	420	10.1021/acs.iecr.0c01946
	HKUST-1	Pebax® PEBA	3 wt%	25	1	Single	16.23	119.3	10.3390/ma11081421		MUF-15	PIM-1	2 wt%	20	1	Single	17.69	12470	10.1016/j.memsci.2020.118245
	NH2-HKUST-1	Pebax® PEBA	3 wt%	25	1	Single	25.97	86.58	10.3390/ma11081421		MUF-15	PIM-1	5 wt%	20	1	Single	17.72	16310	10.1016/j.memsci.2020.118245
	sub-NH2-HKUST-1	Pebax® PEBA	3 wt%	25	1	Single	29.05	108.5	10.3390/ma11081421		MUF-15	PIM-1	10 wt%	20	1	Single	15.68	16740	10.1016/j.memsci.2020.118245
	UiO-66	6FDA-Durene	4 wt%	35	2	50/50	29.6	1283	10.1016/j.memsci.2018.04.040		MUF-15	PIM-1	15 wt%	20	1	Single	15.29	23380	10.1016/j.memsci.2020.118245
	UiO-66	6FDA-Durene	8 wt%	35	2	50/50	32	1728	10.1016/j.memsci.2018.04.040		ns-MUF-15	PIM-1	2 wt%	20	1	Single	19.95	12460	10.1016/j.memsci.2020.118245
	UiO-66	6FDA-Durene	14 wt%	35	2	50/50	30.9	1912	10.1016/j.memsci.2018.04.040		ns-MUF-15	PIM-1	5 wt%	20	1	Single	19.8	16120	10.1016/j.memsci.2020.118245
	UiO-66	6FDA-Durene	21 wt%	35	2	50/50	12.7	2358	10.1016/j.memsci.2018.04.040		ns-MUF-15	PIM-1	5 wt%	20	1	50/50	19.57	13180	10.1016/j.memsci.2020.118245
	UiO-66-NH2	6FDA-Durene	6 wt%	35	2	50/50	34.1	1160	10.1016/j.memsci.2018.04.040		ZIF-67 NS	Pebax	2.5 wt%	25	1	Single	48.2	98.4	10.1016/j.memsci.2019.117404
	UiO-66-NH2	6FDA-Durene	10 wt%	35	2	50/50	30.3	1162	10.1016/j.memsci.2018.04.040		ZIF-67 NS	Pebax	5 wt%	25	1	Single	73.2	139.4	10.1016/j.memsci.2019.117404
	UiO-66-NH2	6FDA-Durene	16 wt%	35	2	50/50	30.1	1223	10.1016/j.memsci.2018.04.040		ZIF-67 NS	Pebax	7.5 wt%	25	1	Single	53.3	112.7	10.1016/j.memsci.2019.117404
	UiO-66-NH2	6FDA-Durene	22 wt%	35	2	50/50	20.7	1514	10.1016/j.memsci.2018.04.040		ZIF-67 NS	Pebax	10 wt%	25	1	Single	47.7	105.6	10.1016/j.memsci.2019.117404
	UiO-66-NH-COCH3	6FDA-Durene	6 wt%	35	2	50/50	30.2	1078	10.1016/j.memsci.2018.04.040		ZIF-67 NP	Pebax	5 wt%	25	1	Single	46	95.7	10.1016/j.memsci.2019.117404
	UiO-66-NH-COCH3	6FDA-Durene	11 wt%	35	2	50/50	32.6	1170	10.1016/j.memsci.2018.04.040		ZIF-67 MP	Pebax	5 wt%	25	1	Single	45.1	101	10.1016/j.memsci.2019.117404
	UiO-66-NH-COCH3	6FDA-Durene	16 wt%	35	2	50/50	33.1	1263	10.1016/j.memsci.2018.04.040		MOF-801	PIM-1	1 wt%	35	4	Single	23	6609	10.1016/j.seppur.2020.117198
	UiO-66-NH-COCH3	6FDA-Durene	24 wt%	35	2	50/50	24.1	1414	10.1016/j.memsci.2018.04.040		MOF-801	PIM-1	3 wt%	35	4	Single	23.5	7278	10.1016/j.seppur.2020.117198
	Y-fun-fcu-MOF	6FDA-DAM	20 wt%	-40	1.38	Single	130	1050	10.1002/advs.201800982		MOF-801	PIM-1	5 wt%	35	4	Single	27	9686	10.1016/j.seppur.2020.117198
	MIL-53(Al)	Pebax	5 wt%	35	10	Single	18.7	127.4	10.1016/j.seppur.2018.02.038		MOF-801	PIM-1	7 wt%	35	4	Single	19	4660	10.1016/j.seppur.2020.117198
	MIL-53(Al)	Pebax	10 wt%	35	10	Single	23.3	129	10.1016/j.seppur.2018.02.038		MKP-PVAm	mPSf	44.44 wt%	25	1.5	15/85	582	324.2	10.1002/adma.201907701
	MIL-53(Al)	Pebax	15 wt%	35	10	Single	17.4	105.4	10.1016/j.seppur.2018.02.038		MKP-PVAm	mPSf (dried)	44.44 wt%	25	1.5	15/85	182	162	10.1002/adma.201907701
	MIL-53(Al)	Pebax	20 wt%	35	10	Single	17.2	95.7	10.1016/j.seppur.2018.02.038		MKP-PVAm	mPSf	50 wt%	25	1.5	15/85	331	378	10.1002/adma.201907701
	NH2-MIL-53(Al)	Pebax	5 wt%	35	10	Single	19.1	134.6	10.1016/j.seppur.2018.02.038		NH2-ZIF-8	Pebax	6 wt%	25	1	Single	62	163.8	10.1016/j.seppur.2019.116209
	NH2-MIL-53(Al)	Pebax	10 wt%	35	10	Single	20.5	149.1	10.1016/j.seppur.2018.02.038		[Bmim][PF6]@ZIF-8	Pebax 1657	25 wt%	25	2	Single	85	117	10.1016/j.memsci.2020.118101
	NH2-MIL-53(Al)	Pebax	15 wt%	35	10	Single	20.6	125.6	10.1016/j.seppur.2018.02.038		MWCNTs@ZIF-8	Pebax	8 wt%	35	5	Single	61.3	186.3	10.1016/j.seppur.2020.117080
	NH2-MIL-53(Al)	Pebax	20 wt%	35	10	Single	17.3	63.3	10.1016/j.seppur.2018.02.038		ZIF-8	PIM-1	0.05 mmol	35	3.5	20/80	24.8	4027	10.1073/pnas.2114964119
	ZIF-8	Matrimid-PEG (96:4)	30 wt%	25	8	50/50	15.42	31.4	10.1002/ceat.201800499		ZIF-8	PIM-1	0.1 mmol	35	3.5	20/80	24.4	6338	10.1073/pnas.2114964119
	ns-Ni(im)2	Pebax	0.5 wt%	25	2	Single	25	124.2	10.1021/acssuschemeng.9b06370		ZIF-8	PIM-1	0.15 mmol	35	3.5	20/80	13.1	7629	10.1073/pnas.2114964119
	ns-Ni(im)2	Pebax	1 wt%	25	2	Single	29.9	121.8	10.1021/acssuschemeng.9b06370		ZIF-8	PIM-1	0.2 mmol	35	3.5	20/80	11.9	9321	10.1073/pnas.2114964119
	ns-Ni(im)2	Pebax	2 wt%	25	2	Single	36.5	123.3	10.1021/acssuschemeng.9b06370		CuBTC	PSf	10 wt%	30	5	Single	22.3	8	10.1016/j.ijhydene.2020.10.025
	ns-Ni(im)2	Pebax	3.5 wt%	25	2	Single	21.5	136.5	10.1021/acssuschemeng.9b06370		[bmim][Tf2N]/MOF-801	PIM	1 wt%	35	4	Single	23.9	5880	10.1016/j.memsci.2021.119581
	ns-Ni(im)2	Pebax	0.5 wt%	25	2	50/50	21.8	96.8	10.1021/acssuschemeng.9b06370		[bmim][Tf2N]/MOF-801	PIM	3 wt%	35	4	Single	25.5	7069	10.1016/j.memsci.2021.119581
	ns-Ni(im)2	Pebax	1 wt%	25	2	50/50	24.9	96.5	10.1021/acssuschemeng.9b06370		[bmim][Tf2N]/MOF-801	PIM	5 wt%	35	4	Single	29	9420	10.1016/j.memsci.2021.119581
	ns-Ni(im)2	Pebax	2 wt%	25	2	50/50	33.4	100.6	10.1021/acssuschemeng.9b06370		[bmim][Tf2N]/MOF-801	PIM	7 wt%	35	4	Single	19.5	5570	10.1016/j.memsci.2021.119581
	ns-Ni(im)2	Pebax	3.5 wt%	25	2	50/50	21.7	114.7	10.1021/acssuschemeng.9b06370		[BMIM][Br]/MIL101(Cr)	Matrimid 5218	10 wt%	30	0.7	Single	15.2	11.8	10.1016/j.seppur.2021.119303
	MIL-101A	PIM-1A	9.1 wt%	25	1	Single	11.4	3570	10.1016/j.seppur.2018.11.055		[BMIM][Br]/MIL101(Cr)	Matrimid 5218	20 wt%	30	0.7	Single	26.9	9.9	10.1016/j.seppur.2021.119303
	MIL-101A	PIM-1A	16.6 wt%	25	1	Single	13.1	9950	10.1016/j.seppur.2018.11.055		[BMIM][Br]/MIL101(Cr)	Matrimid 5218	30 wt%	30	0.7	Single	19.7	7.9	10.1016/j.seppur.2021.119303
	MIL-101A	PIM-1A	28.6 wt%	25	1	Single	8	22000	10.1016/j.seppur.2018.11.055		Zn2(bim)4	PIM-1	2 wt%	30	0.5	Single	19.6078	1000	10.1021/acssuschemeng.0c06297
	MIL-101B	PIM-1B	9.1 wt%	25	1	Single	16.1	4080	10.1016/j.seppur.2018.11.055		Zn2(bim)4	PIM-1	10 wt%	30	0.5	Single	15.4264	1990	10.1021/acssuschemeng.0c06297
	MIL-101B	PIM-1B	16.6 wt%	25	1	Single	13.4	8960	10.1016/j.seppur.2018.11.055		Mg-MOF-74	PIM-1	8 wt%	30	0.5	Single	17.2768	1935	10.1021/acssuschemeng.0c06297
	MIL-101B	PIM-1B	28.6 wt%	25	1	Single	14.1	7550	10.1016/j.seppur.2018.11.055		Mg-MOF-74	PIM-1	10 wt%	30	0.5	Single	16.193	1846	10.1021/acssuschemeng.0c06297
	NanoMIL-101	PIM-1A	9.1 wt%	25	1	Single	11.7	2830	10.1016/j.seppur.2018.11.055		MIL-53	PIM-1	4 wt%	30	0.5	Single	17.0179	953	10.1021/acssuschemeng.0c06297
	NanoMIL-101	PIM-1A	16.6 wt%	25	1	Single	10.7	5940	10.1016/j.seppur.2018.11.055		TIFSIX-3	PIM-1	4 wt%	30	0.5	Single	19.2308	1000	10.1021/acssuschemeng.0c06297
	NanoMIL-101	PIM-1A	23.1 wt%	25	1	Single	11.8	8310	10.1016/j.seppur.2018.11.055		ZIF-8@CNT	Pebax 1657	5 wt%	35	5	-	48.9	225.5	10.1021/acsomega.1c00493
	NanoMIL-101	PIM-1A	28.6 wt%	25	1	Single	11.9	10600	10.1016/j.seppur.2018.11.055		ZIF-68	Matrimid	20 wt%	35	10	50/50	30	27	10.1016/j.seppur.2020.118103
	ED-MIL-101	PIM-1B	9.1 wt%	25	1	Single	13.9	5900	10.1016/j.seppur.2018.11.055		NH2-MIL-53(Al)	6FDA-ODA	20 wt%	35	2	15/85	13	36.9	10.1016/j.seppur.2021.118786
	ED-MIL-101	PIM-1B	16.6 wt%	25	1	Single	13.1	4510	10.1016/j.seppur.2018.11.055		BIT-72	Pebax 1657	10 wt%	25	10	Single	48.69	93	10.1016/j.cherd.2021.12.007
	ED-MIL-101	PIM-1B	23.1 wt%	25	1	Single	11.8	4760	10.1016/j.seppur.2018.11.055		BIT-72	Pebax 1657	20 wt%	25	10	Single	50.92	111	10.1016/j.cherd.2021.12.007
	ED-MIL-101	PIM-1B	28.6 wt%	25	1	Single	11.9	3040	10.1016/j.seppur.2018.11.055		BIT-72	Pebax 1657	30 wt%	25	10	Single	56.28	139	10.1016/j.cherd.2021.12.007
	NH2-MIL-101	PIM-1B	9.1 wt%	25	1	Single	13.4	7230	10.1016/j.seppur.2018.11.055		O2-BIT-72	Pebax 1657	30 wt%	25	10	Single	66.2	145	10.1016/j.cherd.2021.12.007
	NH2-MIL-101	PIM-1B	16.6 wt%	25	1	Single	13.2	6550	10.1016/j.seppur.2018.11.055		N2-BIT-72	Pebax 1657	30 wt%	25	10	Single	72.6	146	10.1016/j.cherd.2021.12.007
	NH2-MIL-101	PIM-1B	23.1 wt%	25	1	Single	11.7	6800	10.1016/j.seppur.2018.11.055		BIT-72	Pebax 1657	10 wt%	25	10	50/50	46.28	87	10.1016/j.cherd.2021.12.007
	MIL-101A	PIM-1A	9.1 wt%	25	1	Single	12.2	14600	10.1016/j.seppur.2018.11.055		BIT-72	Pebax 1657	20 wt%	25	10	50/50	48.11	102	10.1016/j.cherd.2021.12.007
	MIL-101A	PIM-1A	16.6 wt%	25	1	Single	10.9	23500	10.1016/j.seppur.2018.11.055		BIT-72	Pebax 1657	30 wt%	25	10	50/50	53.28	130	10.1016/j.cherd.2021.12.007
	MIL-101A	PIM-1A	23.1 wt%	25	1	Single	15.3	22500	10.1016/j.seppur.2018.11.055		O2-BIT-72	Pebax 1657	30 wt%	25	10	50/50	70.15	141	10.1016/j.cherd.2021.12.007
	MIL-101A	PIM-1A	28.6 wt%	25	1	Single	11.7	35600	10.1016/j.seppur.2018.11.055		N2-BIT-72	Pebax 1657	30 wt%	25	10	50/50	65.6	143	10.1016/j.cherd.2021.12.007
	MIL-101B	PIM-1B	9.1 wt%	25	1	Single	13.9	8390	10.1016/j.seppur.2018.11.055		NUS-8-NH2	PIM-1	1.6 wt%	25	2	20/80	25	10528	10.1016/j.memsci.2021.119912
	MIL-101B	PIM-1B	16.6 wt%	25	1	Single	15.8	11600	10.1016/j.seppur.2018.11.055		NUS-8-NH2	PIM-1	2.5 wt%	25	2	20/80	28.2	10819	10.1016/j.memsci.2021.119912
	NanoMIL-101	PIM-1A	9.1 wt%	25	1	Single	12.9	8530	10.1016/j.seppur.2018.11.055		NUS-8-NH2	PIM-1	5.6 wt%	25	2	20/80	30.7	11573	10.1016/j.memsci.2021.119912
	NanoMIL-101	PIM-1A	16.6 wt%	25	1	Single	11.9	13600	10.1016/j.seppur.2018.11.055		NUS-8-NH2	PIM-1	10.4 wt%	25	2	20/80	29.2	14638	10.1016/j.memsci.2021.119912
	NanoMIL-101	PIM-1A	23.1 wt%	25	1	Single	12.9	18800	10.1016/j.seppur.2018.11.055		NUS-8-NH2	PIM-1	13 wt%	25	2	20/80	24.7	14622	10.1016/j.memsci.2021.119912
	NanoMIL-101	PIM-1A	28.6 wt%	25	1	Single	12.5	23200	10.1016/j.seppur.2018.11.055		NUS-8-NH2	PIM-1	15 wt%	25	2	20/80	24.9	14039	10.1016/j.memsci.2021.119912
	ED-MIL-101	PIM-1B	9.1 wt%	25	1	Single	11.5	8580	10.1016/j.seppur.2018.11.055		ZIF-90@C3N4	Pebax1657	8 wt%	25	2	Single	84.35	110.51	10.1016/j.seppur.2021.119803
	ED-MIL-101	PIM-1B	23.1 wt%	25	1	Single	12.6	8070	10.1016/j.seppur.2018.11.055		UiO-66-NH2	Pebax	0.5 wt%	30	1	Single	55.7	234	10.3390/polym14040655
	ED-MIL-101	PIM-1B	28.6 wt%	25	1	Single	12.9	7470	10.1016/j.seppur.2018.11.055		UiO-66-NH2	Pebax	1 wt%	30	1	Single	56.1	247	10.3390/polym14040655
	NH2-MIL-101	PIM-1B	9.1 wt%	25	1	Single	13.1	10430	10.1016/j.seppur.2018.11.055		UiO-66-NH2	Pebax	3 wt%	30	1	Single	53.1	196.5	10.3390/polym14040655
	NH2-MIL-101	PIM-1B	16.6 wt%	25	1	Single	14.6	10700	10.1016/j.seppur.2018.11.055		UiO-66-NH2	Pebax	5 wt%	30	1	Single	50	114.3	10.3390/polym14040655
	NH2-MIL-101	PIM-1B	23.1 wt%	25	1	Single	16.2	10200	10.1016/j.seppur.2018.11.055		CuBTC	Pebax	10 wt%	35	1	Single	71.2	190	10.1016/j.memsci.2022.120712
	MIL-101A	PIM-1A	28.6 wt%	25	1	35/65	24.4	3706	10.1016/j.seppur.2018.11.055		CuBTC	Pebax	15 wt%	35	1	Single	128.8	286	10.1016/j.memsci.2022.120712
	Bio-MOF-1	Polysulfone	30 wt%	25	10	Single	42.6	16.57	10.1016/j.seppur.2018.08.031		CuBTC	Pebax	20 wt%	35	1	Single	64.4	177	10.1016/j.memsci.2022.120712
	Bio-MOF-1	Polysulfone	30 wt%	25	10	50/50	39	14.1	10.1016/j.seppur.2018.08.031		[EMIM][OAc]/CuBTC	Pebax	10 wt%	35	1	Single	71.9	157.5	10.1016/j.memsci.2022.120712
	HKUST-1 w. inter- connected branches	6FDA-DAM	10 wt%	35	1.03	Single	18.4	1600	10.1002/cssc.201900623		[EMIM][OAc]/CuBTC	Pebax	15 wt%	35	1	Single	176.3	335	10.1016/j.memsci.2022.120712
	HKUST-1 w. inter- connected branches	6FDA-DAM	20 wt%	35	1.03	Single	17.7	1920	10.1002/cssc.201900623		[EMIM][OAc]/CuBTC	Pebax	20 wt%	35	1	Single	117.2	198	10.1016/j.memsci.2022.120712
	HKUST-1 w. inter- connected branches	6FDA-DAM	30 wt%	35	1.03	Single	16.5	2480	10.1002/cssc.201900623		MIL-178(Fe)	Pebax 3533	3 wt%	35	1	15/85	21	315	10.1016/j.ijggc.2022.103791
	HKUST-1 bulk	6FDA-DAM	10 wt%	35	1.03	Single	18.8	1450	10.1002/cssc.201900623		MIL-178(Fe)	Pebax 3533	5 wt%	35	1	15/85	25	312	10.1016/j.ijggc.2022.103791
	HKUST-1 bulk	6FDA-DAM	20 wt%	35	1.03	Single	15.5	1690	10.1002/cssc.201900623		MIL-178(Fe)	Pebax 3533	10 wt%	35	1	15/85	22	286	10.1016/j.ijggc.2022.103791
	HKUST-1 bulk	6FDA-DAM	30 wt%	35	1.03	Single	14.9	2360	10.1002/cssc.201900623		MIL-178(Fe)	Pebax 3533	15 wt%	35	1	15/85	19	275	10.1016/j.ijggc.2022.103791
	Bipyridine-based UiO-67	Matrimid 5218	10 wt%	30	5	50/50	75	26	10.1016/j.memsci.2019.01.016		Co(AzDC)	Matrimid 5218	10 wt%	30	2	10/90	33	70	10.1016/j.gce.2021.09.004
	NH2-MIL-53(Al)	Tröger's base polymer	10 wt%	35	4	Single	20.2	187.6	10.1016/j.memsci.2018.12.004		Co(AzDC)	Matrimid 5218 (humidified)	10 wt%	30	2	10/90	78	156	10.1016/j.gce.2021.09.004
	NH2-MIL-53(Al)	Tröger's base polymer	20 wt%	35	4	Single	18.9	324.5	10.1016/j.memsci.2018.12.004		(001)-AlFFIVE	6FDA-DAM	58.9 wt%	35	2.03	Single	18.3	1243.5	10.1126/science.abe0192
	NH2-MIL-53(Al)	Tröger's base polymer	25 wt%	35	4	Single	18.9	138.8	10.1016/j.memsci.2018.12.004		(001)-AlFFIVE	6FDA-DAM-DAT	59.6 wt%	35	2.03	Single	21.4	524.3	10.1126/science.abe0192
	NH2-MIL-53(Al)	Tröger's base polymer	30 wt%	35	4	Single	19.2	85.6	10.1016/j.memsci.2018.12.004		(001)-AlFFIVE	6FDA-DAT	60.3 wt%	35	2.03	Single	27.6	132.5	10.1126/science.abe0192
	CBMN	6FDA-durene-DABA	1 wt%	25	3	Single	28.6	352	10.1021/acsami.0c14639		BCoC-ZIF	PIM-1	10 wt%	25	2	50/50	32.5	7325	10.1016/j.memsci.2022.120928
	CBMN	6FDA-durene-DABA	2 wt%	25	3	Single	33.6	333	10.1021/acsami.0c14639		UiO-66-FA	PIM-1	20 wt%	30	2	50/50	23.1	16591	10.1021/acssuschemeng.1c08485
	CBMN	6FDA-durene-DABA	3 wt%	25	3	Single	30.5	297	10.1021/acsami.0c14639		ZIF-8-PEI@[P(3)HIm][Tf2N]	Pebax	15 wt%	24	2	Single	76	285	10.1016/j.cherd.2022.03.023
	CBMN	6FDA-durene-DABA	5 wt%	25	3	Single	31.5	212	10.1021/acsami.0c14639		CFA-1	Pebax 1657	3 wt%	30	1	Single	88.6	869	10.1016/j.seppur.2021.120371
	CBMN	6FDA-durene-DABA	8 wt%	25	3	Single	28.9	185	10.1021/acsami.0c14639		CFA-1	Pebax 1657	3 wt%	30	1	10/90	79	821	10.1016/j.seppur.2021.120371
	CBMN	6FDA-durene-DABA	15 wt%	25	3	Single	28	96	10.1021/acsami.0c14639		CFA-1	Pebax 1657 (humidified)	3 wt%	30	1	10/90	83	1409	10.1016/j.seppur.2021.120371
	MUF-15	PIM-1	2 wt%	20	1	Single	7.06	12470	10.1016/j.memsci.2020.118245		UiO-66-NH2	PIM-PU	10 wt%	35	1	Single	138	333	10.1016/j.seppur.2022.121452
	MUF-15	PIM-1	5 wt%	20	1	Single	7.62	16310	10.1016/j.memsci.2020.118245		MIL-GO-2	Pebax 2533	9.1 wt%	20	2	Single	24	303	10.1039/D2RA05095A
	MUF-15	PIM-1	10 wt%	20	1	Single	6.77	16740	10.1016/j.memsci.2020.118245		Zn2(bim)4	PIM-PMDA-OH	5 wt%	35	1	Single	54.8	341.8	10.1016/j.jece.2022.107274
	MUF-15	PIM-1	15 wt%	20	1	Single	6.75	23400	10.1016/j.memsci.2020.118245		Zn2(bim)4	PIM-PMDA-OH	4 wt%	35	1	50/50	57.7	173.3	10.1016/j.jece.2022.107274
	ns-MUF-15	PIM-1	2 wt%	20	1	Single	8.37	12460	10.1016/j.memsci.2020.118245		Ln-MOF	Matrimid	30 wt%	35	10	Single	48.5	20.5	10.1016/j.chemosphere.2022.136051
	ns-MUF-15	PIM-1	5 wt%	20	1	Single	8.6	16120	10.1016/j.memsci.2020.118245		Ln-MOF	Matrimid	30 wt%	35	10	50/50	45	15.2	10.1016/j.chemosphere.2022.136051
	MOF-199	6FDA-mPD	8 wt%	25	3	50/50	67	12	10.1039/C9DT03222C		SUM-1	Pebax 2533	5 wt%	35	2	10/90	20.5	380.9	10.1021/acs.iecr.3c02308
	MOF-199	6FDA-mPD	16 wt%	25	3	50/50	73	20	10.1039/C9DT03222C		SUM-9	Pebax 2533	1 wt%	35	2	10/90	18.5	390.9	10.1021/acs.iecr.3c02308
	MOF-199	6FDA-mPD	24 wt%	25	3	50/50	89	28.3	10.1039/C9DT03222C		ZIF-8	Maltitol modified Pebax 1657	5 wt%	30	10	Single	69	400	10.1016/j.psep.2022.12.058
	MIL-101(Cr)	6FDA-mPD	8 wt%	25	3	50/50	53	14	10.1039/C9DT03222C		CeZrUiO66-NH2	Pebax 1657	3 wt%	35	1	Single	76	101	10.1016/j.seppur.2023.124251
	MIL-101(Cr)	6FDA-mPD	16 wt%	25	3	50/50	54	29	10.1039/C9DT03222C		[MPPyr][DCA]@ MIL-101(Cr)	Pebax-1657	15 wt%	35	1	Single	1347	148	10.1016/j.seppur.2023.123346
	MIL-101(Cr)	6FDA-mPD	24 wt%	25	3	50/50	50	50	10.1039/C9DT03222C		PEI-F-Ce-2	XLPEO	2 wt%	35	2	Single	70.1	641	10.1016/j.seppur.2023.124512
	CeBTB	6FDA-DAM	10 wt%	20	3	50/50	37.4	1150	10.1016/j.memsci.2019.117772		SUM-9	Pebax MH 2533	1 wt%	35	6	Single	24.7	539	10.1016/j.seppur.2022.122476
	CC3	6FDA-DAM	20 wt%	20	3	50/50	27	1700	10.1016/j.memsci.2020.118288		ZIF-L(Co)	Pebax MH 1657	2 wt%	25	4	Single	67	56	10.1016/j.chemosphere.2023.140249
	ZIF-67 NS	Pebax	2.5 wt%	25	1	Single	14.4	98.4	10.1016/j.memsci.2019.117404		ZIF-L(Zn)	Pebax MH 1657	2 wt%	25	4	Single	76	54	10.1016/j.chemosphere.2023.140249
	ZIF-67 NS	Pebax	5 wt%	25	1	Single	17.6	139.4	10.1016/j.memsci.2019.117404		ZIF-L(Zn)@ZIF-67	Pebax MH 1657	2 wt%	25	4	Single	94	64	10.1016/j.chemosphere.2023.140249
	ZIF-67 NS	Pebax	7.5 wt%	25	1	Single	17.4	112.7	10.1016/j.memsci.2019.117404		Ag+@UiO-66-NH2	PIM-1	5 wt%	25	2	Single	22.3	9152.1	10.1016/j.memsci.2023.121775
	ZIF-67 NS	Pebax	10 wt%	25	1	Single	17.4	105.6	10.1016/j.memsci.2019.117404		UiO-66-NH2	PIM-1	5 wt%	25	2	Single	14.6	7777.4	10.1016/j.memsci.2023.121775
	ZIF-67 NP	Pebax	5 wt%	25	1	Single	12.9	95.7	10.1016/j.memsci.2019.117404		C-ZIF-700	Pebax MH 1657	10 wt%	35	4	15/85	51.4	161.3	10.1016/j.memsci.2023.121356
	ZIF-67 MP	Pebax	5 wt%	25	1	Single	12.8	101	10.1016/j.memsci.2019.117404		UiO-66-NH2	(ODPA0.25/6FDA0.75)-DAM (P4)	29 wt%	35	3	Single	11.2	516.5	10.1126/sciadv.adf5087
	ZIF-8	PIM-1	0.05 mmol	35	3.5	40/60	15.8	4027	10.1073/pnas.2114964119		UiO-66-NM@PEG	PVDF	23.5 wt%	25	1	Single	44.5	611.1	10.1016/j.memsci.2023.121755
	ZIF-8	PIM-1	0.1 mmol	35	3.5	40/60	18.8	6338	10.1073/pnas.2114964119		MOF-525	6FDA-DAM	2 wt%	25	2	Single	14.8	520.7	10.1016/j.ccst.2024.100252
	ZIF-8	PIM-1	0.15 mmol	35	3.5	40/60	9.07	7629	10.1073/pnas.2114964119		MOF-525(Co)	6FDA-DAM	2 wt%	25	2	Single	20.5	494.7	10.1016/j.ccst.2024.100252
	ZIF-8	PIM-1	0.2 mmol	35	3.5	40/60	8.97	9321	10.1073/pnas.2114964119		MOF-525(Zn)	6FDA-DAM	2 wt%	25	2	Single	20.8	475.1	10.1016/j.ccst.2024.100252
	Zn2(bim)4	PIM-1	2 wt%	30	0.5	Single	13.6986	1000	10.1021/acssuschemeng.0c06297		MOF-525	6FDA-DAM	5 wt%	25	2	Single	22.1	486	10.1016/j.ccst.2024.100252
	Zn2(bim)4	PIM-1	10 wt%	30	0.5	Single	10.2577	1990	10.1021/acssuschemeng.0c06297		MOF-525(Co)	6FDA-DAM	5 wt%	25	2	Single	20.3	463.2	10.1016/j.ccst.2024.100252
	Mg-MOF-74	PIM-1	8 wt%	30	0.5	Single	12.4038	1935	10.1021/acssuschemeng.0c06297		MOF-525(Zn)	6FDA-DAM	5 wt%	25	2	Single	18.3	486	10.1016/j.ccst.2024.100252
	Mg-MOF-74	PIM-1	10 wt%	30	0.5	Single	11.8333	1846	10.1021/acssuschemeng.0c06297		MOF-525	6FDA-DAM	10 wt%	25	2	Single	20.6	572.8	10.1016/j.ccst.2024.100252
	MIL-53	PIM-1	4 wt%	30	0.5	Single	12.7067	953	10.1021/acssuschemeng.0c06297		MOF-525(Co)	6FDA-DAM	10 wt%	25	2	Single	18.6	451.3	10.1016/j.ccst.2024.100252
	TIFSIX-3	PIM-1	4 wt%	30	0.5	Single	14.0845	1000	10.1021/acssuschemeng.0c06297		MOF-525(Zn)	6FDA-DAM	10 wt%	25	2	Single	18.5	546.7	10.1016/j.ccst.2024.100252
	Cu(BPY)2(OTF)2	Pebax 1657	4 wt%	25	1	Single	13.46	84.44	10.1016/j.seppur.2020.118107		ZIF-78	PSf	10 wt%	30	2.8	Single	54	13	10.1016/j.jtice.2024.105418
	Cu(BPY)2(OTF)2	Pebax 1657	4 wt%	25	1	10/90	43.3	355.3	10.1016/j.seppur.2020.118107		UiO-66-(CF3)2	PIM-1	8 wt%	60	1	Single	34	5242	10.1016/j.seppur.2024.126666
	Bio-ZIF	Pebax	12 wt%	25	2	20/80	40	560	10.1016/j.seppur.2021.119347		PEI-ZIF-L	Pebax 3533	2 wt%	35	2	10/90	27	639	10.1016/j.seppur.2024.126831
	ZIF-68	Matrimid	20 wt%	35	10	50/50	35	25	10.1016/j.seppur.2020.118103		PAMAM-ZIF-L	Pebax 3533	2 wt%	35	2	10/90	24	703	10.1016/j.seppur.2024.126831
	ZIF-301	6FDA-DAM	20 wt%	25	4	Single	29	891	10.1016/j.seppur.2021.118431		MOF-808@PVAm	PVAm	33.33 wt%	25	2	15/85	181	399	10.1016/j.ccst.2023.100156
	NUS-8-NH2	PIM-1	1.6 wt%	25	2	30/70	9.5	7455	10.1016/j.memsci.2021.119912
	NUS-8-NH2	PIM-1	2.5 wt%	25	2	30/70	8.2	7667	10.1016/j.memsci.2021.119912
	NUS-8-NH2	PIM-1	5.6 wt%	25	2	30/70	6.4	8504	10.1016/j.memsci.2021.119912
	NUS-8-NH2	PIM-1	10.4 wt%	25	2	30/70	7.2	10817	10.1016/j.memsci.2021.119912
	NUS-8-NH2	PIM-1	13 wt%	25	2	30/70	7.9	13180	10.1016/j.memsci.2021.119912
	NUS-8-NH2	PIM-1	15 wt%	25	2	30/70	7.4	11039	10.1016/j.memsci.2021.119912
	Gly@HKUST-1	Pebax® 1657	5 wt%	25	2	Single	33	182	10.1016/j.seppur.2022.121287
	Gly@HKUST-1	Pebax® 1657	5 wt%	25	2	50/50	29	175	10.1016/j.seppur.2022.121287
	UiO-66-NH2	Pebax	0.5 wt%	30	1	Single	16.3	234	10.3390/polym14040655
	UiO-66-NH2	Pebax	1 wt%	30	1	Single	17	247	10.3390/polym14040655
	UiO-66-NH2	Pebax	3 wt%	30	1	Single	17.1	196.5	10.3390/polym14040655
	UiO-66-NH2	Pebax	5 wt%	30	1	Single	16.9	114.3	10.3390/polym14040655
	MIL-178(Fe)	Pebax 3533	5 wt%	35	1	50/50	8.7	295	10.1016/j.ijggc.2022.103791
	(001)-AlFFIVE	6FDA-DAM	58.9 wt%	35	2.03	Single	29.3	1243.5	10.1126/science.abe0192
	(001)-AlFFIVE	6FDA-DAM-DAT	59.6 wt%	35	2.03	Single	69.3	524.3	10.1126/science.abe0192
	(001)-AlFFIVE	6FDA-DAT	60.3 wt%	35	2.03	Single	106.9	132.5	10.1126/science.abe0192
	(001)-AlFFIVE	6FDA-DAM	58.9 wt%	35	2.07	50/50	39.6	1287.4	10.1126/science.abe0192
	(001)-AlFFIVE	6FDA-DAM	58.9 wt%	35	5.17	20/80	40.4	1198.4	10.1126/science.abe0192
	(001)-AlFFIVE	6FDA-DAM	58.9 wt%	35	10.3	10/90	41.2	1095.4	10.1126/science.abe0192
	(001)-AlFFIVE	6FDA-DAM-DAT	59.6 wt%	35	2.07	50/50	78.3	578	10.1126/science.abe0192
	(001)-AlFFIVE	6FDA-DAM-DAT	59.6 wt%	35	5.17	20/80	82.7	505.8	10.1126/science.abe0192
	(001)-AlFFIVE	6FDA-DAM-DAT	59.6 wt%	35	10.3	10/90	84.7	435.9	10.1126/science.abe0192
	(001)-AlFFIVE	6FDA-DAT	60.3 wt%	35	2.07	50/50	119.7	146.5	10.1126/science.abe0192
	(001)-AlFFIVE	6FDA-DAT	60.3 wt%	35	5.17	20/80	129.4	151.8	10.1126/science.abe0192
	(001)-AlFFIVE	6FDA-DAT	60.3 wt%	35	10.3	10/90	141.8	129.8	10.1126/science.abe0192
	ZIF-8-PEI@[P(3)HIm][Tf2N]	Pebax	15 wt%	24	2	Single	25	285	10.1016/j.cherd.2022.03.023
	CAU-10-H	6FDA-DAM:DABA	25 wt%	35	2	Single	67	29	10.1016/j.memsci.2022.121024
	Ni-NS-8	Pebax	2 wt%	25	2	10/90	30.2	127	10.1016/j.memsci.2022.121305
	Ni-NS-8	Pebax	6 wt%	25	2	10/90	31.7	170.3	10.1016/j.memsci.2022.121305
	[MPPyr][DCA]@ MIL-101(Cr)	Pebax-1657	15 wt%	35	1	Single	122	148	10.1016/j.seppur.2023.123346
	MOF-525	6FDA-DAM	2 wt%	25	2	Single	15.7	520.7	10.1016/j.ccst.2024.100252
	MOF-525(Co)	6FDA-DAM	2 wt%	25	2	Single	22.3	494.7	10.1016/j.ccst.2024.100252
	MOF-525(Zn)	6FDA-DAM	2 wt%	25	2	Single	22.1	475.1	10.1016/j.ccst.2024.100252
	MOF-525	6FDA-DAM	5 wt%	25	2	Single	22.9	486	10.1016/j.ccst.2024.100252
	MOF-525(Co)	6FDA-DAM	5 wt%	25	2	Single	22.6	463.2	10.1016/j.ccst.2024.100252
	MOF-525(Zn)	6FDA-DAM	5 wt%	25	2	Single	21.3	486	10.1016/j.ccst.2024.100252
	MOF-525	6FDA-DAM	10 wt%	25	2	Single	22.8	572.8	10.1016/j.ccst.2024.100252
	MOF-525(Co)	6FDA-DAM	10 wt%	25	2	Single	21.5	451.3	10.1016/j.ccst.2024.100252
	MOF-525(Zn)	6FDA-DAM	10 wt%	25	2	Single	19.7	546.7	10.1016/j.ccst.2024.100252
	NTU-88c	6FDA-DAM	10 wt%	60	3	50/50	34	1140	10.1016/j.memsci.2024.123080
	NTU-88c	6FDA-DAM	10 wt%	25	10	50/50	41	645	10.1016/j.memsci.2024.123080
	NTU-88c	6FDA-DAM	5 wt%	25	3	Single	21.7	567.5	10.1016/j.memsci.2024.123080
	NTU-88c	6FDA-DAM	10 wt%	25	3	Single	18.1	899.4	10.1016/j.memsci.2024.123080
	NTU-88c	6FDA-DAM	15 wt%	25	3	Single	19.8	866.9	10.1016/j.memsci.2024.123080
	NTU-88c	6FDA-DAM	20 wt%	25	3	Single	22.4	565.9	10.1016/j.memsci.2024.123080
	ZIF-8-NH2	6FBDA	50 wt%	35	4.5	Single	89	81	10.1016/j.memsci.2023.122326
	UiO-66	PEI	10 wt%	25	1	Single	33	400	10.1016/j.memsci.2023.122174
	UiO-66	PIM-1	2.5 wt%	35	3	50/50	9.4	7842	10.1016/j.seppur.2023.125558
	UiO-66	PIM-1	5 wt%	35	3	50/50	11	8225	10.1016/j.seppur.2023.125558
	UiO-66	PIM-1	7.5 wt%	35	3	50/50	12.9	8753	10.1016/j.seppur.2023.125558
	UiO-66	PIM-1	10 wt%	35	3	50/50	12.5	8995	10.1016/j.seppur.2023.125558
	MOF-808	PIM-1	2.5 wt%	35	3	50/50	9.5	8053	10.1016/j.seppur.2023.125558
	MOF-808	PIM-1	5 wt%	35	3	50/50	11.4	8579	10.1016/j.seppur.2023.125558
	MOF-808	PIM-1	7.5 wt%	35	3	50/50	14.6	8897	10.1016/j.seppur.2023.125558
	MOF-808	PIM-1	10 wt%	35	3	50/50	16.2	9090	10.1016/j.seppur.2023.125558
	UiO-66	Cellulose	10 wt%	85	3	Single	71	257	10.1016/j.memsci.2024.122532
	AlFFIVE-1-Ni	PIM-1	29.1 wt%	35	2	Single	16.9	4985.7	10.1126/sciadv.adk5846
	AlFFIVE-1-Ni	PIM-1	38.3 wt%	35	2	Single	17.6	6098.4	10.1126/sciadv.adk5846
	AlFFIVE-1-Ni	PIM-1	29.1	35	2	50/50	17.5	4818.7	10.1126/sciadv.adk5846
	AlFFIVE-1-Ni	PIM-1	38.3 wt%	35	2	50/50	18.2	5847.5	10.1126/sciadv.adk5846

## Sheet: Sour Gas Robeson
	CO2/H2S/CH4
	Membrane	T (°C)	P (bar)	Feed (H2S/CO2/CH4)	Selectivity (-)	Permeability (Barrer)	DOI	Ref
	6FDA-DAM	35	6.9	20/20/60	39.7	671.8	10.1038/s41563-017-0013-1	G. Liu et al. (2018a)
	6FDA-DAM	35	10	1/9/90	43.9	1208	10.1126/science.abe0192	S. J. Datta et al. (2022)
	6FDA-DAM	35	5	2/18/80	45.5	1255.9	10.1126/science.abe0192	S. J. Datta et al. (2022)
	6FDA-DAM	35	10	5/5/90	46.2	1119.3	10.1126/science.abe0192	S. J. Datta et al. (2022)
	6FDA-DAM	35	6.9	20/20/60	39.7	672	10.1002/anie.201808991	G. Liu et al. (2018b)
	6FDA-DAM	35	20	5/30/65	16.4	9.1	10.1016/j.seppur.2019.115858	M. Z. Ahmad et al. (2020)
	6FDA-DAM-DABA	35	6.9	20/20/60	52.1	137.9	10.1038/s41563-017-0013-1	G. Liu et al. (2018a)
	6FDA-DAM-DAT	35	10	1/9/90	64.1	284.7	10.1126/science.abe0192	S. J. Datta et al. (2022)
	6FDA-DAM-DAT	35	5	2/18/80	66.5	293.1	10.1126/science.abe0192	S. J. Datta et al. (2022)
	6FDA-DAM-DAT	35	10	5/5/90	68.2	261.8	10.1126/science.abe0192	S. J. Datta et al. (2022)
	6FDA-DAT	35	10	1/9/90	89.3	65.7	10.1126/science.abe0192	S. J. Datta et al. (2022)
	6FDA-DAT	35	5	2/18/80	93.4	69.4	10.1126/science.abe0192	S. J. Datta et al. (2022)
	6FDA-DAT	35	10	5/5/90	91.6	63.7	10.1126/science.abe0192	S. J. Datta et al. (2022)
	10.55 wt% Y-fum-fcu-MOF/6FDA-DAM	35	6.9	20/20/60	41.5	823.2	10.1038/s41563-017-0013-1	G. Liu et al. (2018a)
	17.80 wt% Y-fum-fcu-MOF/6FDA-DAM	35	6.9	20/20/60	46.7	936.2	10.1038/s41563-017-0013-1	G. Liu et al. (2018a)
	30.05 wt% Y-fum-fcu-MOF/6FDA-DAM	35	6.9	20/20/60	52.8	1057.7	10.1038/s41563-017-0013-1	G. Liu et al. (2018a)
	9.8 wt% Eu-naph-fcu-MOF/6FDA-DAM	35	6.9	20/20/60	42.5	702.3	10.1038/s41563-017-0013-1	G. Liu et al. (2018a)
	19 wt% Eu-naph-fcu-MOF/6FDA-DAM	35	6.9	20/20/60	49.2	747.8	10.1038/s41563-017-0013-1	G. Liu et al. (2018a)
	58.9 wt% (001)-AIFFIVE/6FDA-DAM	35	10	1/9/90	97.8	1970	10.1126/science.abe0192	S. J. Datta et al. (2022)
	58.9 wt% (001)-AIFFIVE/6FDA-DAM	35	5	2/18/80	99.4	2040.3	10.1126/science.abe0192	S. J. Datta et al. (2022)
	58.9 wt% (001)-AIFFIVE/6FDA-DAM	35	10	5/5/90	103.2	1517.9	10.1126/science.abe0192	S. J. Datta et al. (2022)
	20 wt% NbOFFIVE-1-Ni/6FDA-DAM	35	6.9	20/20/60	48.9	948	10.1002/anie.201808991	G. Liu et al. (2018b)
	20 wt% AlFFIVE-1-Ni/6FDA-DAM	35	6.9	20/20/60	42.4	1047	10.1002/anie.201808991	G. Liu et al. (2018b)
	UiO-66/6FDA-DAM	35	20	5/30/65	15.2	29	10.1016/j.seppur.2019.115858	M. Z. Ahmad et al. (2020)
	UiO-66-NH2/6FDA-DAM	35	20	5/30/65	9.5	18.1	10.1016/j.seppur.2019.115858	M. Z. Ahmad et al. (2020)
	UiO-66-NH2-COCH3/6FDA-DAM	35	20	5/30/65	18.2	34.4	10.1016/j.seppur.2019.115858	M. Z. Ahmad et al. (2020)
	9.9 wt% Y-fum-fcu-MOF/6FDA-DAM-DABA	35	6.9	20/20/60	56.2	196.1	10.1038/s41563-017-0013-1	G. Liu et al. (2018a)
	17.7 wt% Y-fum-fcu-MOF/6FDA-DAM-DABA	35	6.9	20/20/60	66.1	225.9	10.1038/s41563-017-0013-1	G. Liu et al. (2018a)
	59.6 wt% (001)-AIFFIVE/6FDA-DAM-DAT	35	10	1/9/90	135.6	580.5	10.1126/science.abe0192	S. J. Datta et al. (2022)
	59.6 wt% (001)-AIFFIVE/6FDA-DAM-DAT	35	5	2/18/80	145.8	640.2	10.1126/science.abe0192	S. J. Datta et al. (2022)
	59.6 wt% (001)-AIFFIVE/6FDA-DAM-DAT	35	10	5/5/90	143.7	446.1	10.1126/science.abe0192	S. J. Datta et al. (2022)
	60.3 wt% (001)-AIFFIVE/6FDA-DAT	35	10	1/9/90	181.4	157.7	10.1126/science.abe0192	S. J. Datta et al. (2022)
	60.3 wt% (001)-AIFFIVE/6FDA-DAT	35	5	2/18/80	193.2	166.3	10.1126/science.abe0192	S. J. Datta et al. (2022)
	60.3 wt% (001)-AIFFIVE/6FDA-DAT	35	10	5/5/90	189.7	136.3	10.1126/science.abe0192	S. J. Datta et al. (2022)
	MFU-4/6FDA-Durene	35	2	20/20/60	42	1180	10.1021/acs.chemmater.1c01533	Q. Qian et al. (2021)
	UiO-66-NH2/PIM-1	35	8 (tot), p(CO2)=2.1	13.3/26.7/60	24.5946	9100	10.1021/acsami.3c11300	W. Wu et al. (2023)
	UiO-66-NH2/PIM-1	35	8 (tot), p(CO2)=1.5	20/20/60	24.6875	7900	10.1021/acsami.3c11300	W. Wu et al. (2023)
	UiO-66-NH2/PIM-1	35	8 (tot), p(CO2)=1.1	26.7/13.3/60	24.375	7800	10.1021/acsami.3c11300	W. Wu et al. (2023)
	UiO-66-NH2/PIM-COOH	35	8 (tot), p(CO2)=2.1	13.3/26.7/60	45	1260	10.1021/acsami.3c11300	W. Wu et al. (2023)
	UiO-66-NH2/PIM-COOH	35	8 (tot), p(CO2)=1.5	20/20/60	44.8	1120	10.1021/acsami.3c11300	W. Wu et al. (2023)
	UiO-66-NH2/PIM-COOH	35	8 (tot), p(CO2)=1.1	26.7/13.3/60	41.6	1040	10.1021/acsami.3c11300	W. Wu et al. (2023)
